# Supplementary material for: Apple estimation and recognition in complex scenes using YOLO v8
Source: PeerJ journal article supplement (doi:10.7717/peerj-cs.3116), 2025-10-16
Supplement: Appendix_3_staffEH.xlsx [file Appendix_3_staffEH.xlsx]

## Sheet: (1) Number of apples
(1) Number of apples identified by the YOLO v8 model.
Picture serial number	Number of apples	Picture serial number	Number of apples	Picture serial number	Number of apples	Picture serial number	Number of apples	Picture serial number	Number of apples
1	5	41	8	81	3	121	6	161	4
2	5	42	15	82	4	122	9	162	7
3	6	43	0	83	5	123	0	163	6
4	11	44	11	84	3	124	3	164	10
5	9	45	4	85	2	125	0	165	0
6	8	46	0	86	0	126	11	166	0
7	22	47	7	87	0	127	0	167	3
8	2	48	4	88	10	128	5	168	15
9	9	49	7	89	7	129	2	169	3
10	0	50	7	90	0	130	7	170	0
11	0	51	7	91	7	131	5	171	0
12	11	52	8	92	8	132	5	172	7
13	7	53	0	93	0	133	5	173	2
14	10	54	0	94	3	134	6	174	5
15	3	55	0	95	0	135	1	175	5
16	6	56	4	96	2	136	0	176	4
17	4	57	8	97	2	137	0	177	11
18	1	58	2	98	8	138	1	178	5
19	0	59	0	99	0	139	5	179	4
20	8	60	2	100	11	140	6	180	13
21	2	61	8	101	11	141	9	181	4
22	7	62	0	102	8	142	6	182	5
23	1	63	2	103	9	143	9	183	6
24	17	64	0	104	3	144	8	184	2
25	17	65	1	105	0	145	0	185	2
26	3	66	0	106	3	146	4	186	0
27	5	67	11	107	7	147	17	187	14
28	0	68	3	108	2	148	7	188	4
29	3	69	16	109	22	149	8	189	3
30	10	70	11	110	2	150	0	190	6
31	0	71	3	111	1	151	2	191	0
32	17	72	9	112	0	152	8	192	8
33	10	73	9	113	5	153	4	193	0
34	7	74	11	114	1	154	6	194	1
35	5	75	10	115	3	155	0	195	4
36	0	76	9	116	9	156	5	196	11
37	3	77	7	117	0	157	0	197	0
38	1	78	22	118	17	158	2	198	1
39	14	79	0	119	9	159	6	199	0
40	1	80	0	120	0	160	7	200	14

## Sheet: (2) Apple coordinates
(2) Apple coordinates
Number	X	Y	Number	X	Y
1	213	46.5	520	124.5	62
2	97	92	521	164.5	57.5
3	194.5	78	522	103	43.5
4	45.5	146.5	523	87.5	42.5
5	199.5	82	524	157	63
6	213	46.5	525	258.5	14.5
7	97	92	526	82	72.5
8	194.5	78	527	176.5	78.5
9	45.5	146.5	528	135	77.5
10	199.5	82	529	212.5	119
11	96.5	62.5	530	244.5	46.5
12	131.5	92.5	531	9	58.5
13	36.5	14	532	64.5	30.5
14	184.5	88	533	259.5	75
15	6.5	71	534	194.5	107
16	158.5	86	535	47.5	108.5
17	71.5	58	536	6.5	105.5
18	175	168.5	537	199	33
19	155	103.5	538	67	97.5
20	122.5	139	539	4.5	73
21	114	114	540	86.5	79
22	57	100.5	541	41	92.5
23	129.5	40	542	224	48.5
24	177.5	121.5	543	255	31
25	203.5	113	544	167	71
26	224.5	126.5	545	165.5	119.5
27	91.5	107	546	91	62.5
28	21	117	547	121.5	97.5
29	45.5	9	548	222.5	96
30	103.5	169	549	61	137
31	54.5	111.5	550	130.5	91.5
32	115.5	91	551	213.5	99
33	146.5	80	552	41	92.5
34	75.5	139.5	553	224	48.5
35	81.5	89	554	255	31
36	118	59.5	555	167	71
37	263.5	164.5	556	165.5	119.5
38	149.5	86	557	91	62.5
39	243.5	149	558	121.5	97.5
40	113.5	87.5	559	222.5	96
41	8.5	152	560	61	137
42	133.5	86	561	130.5	91.5
43	170	127	562	213.5	99
44	94	140.5	563	184	61.5
45	151	56.5	564	100.5	135
46	90.5	12	565	207.5	34.5
47	26	80	566	252.5	39.5
48	176.5	71	567	239	112.5
49	28	32.5	568	149	130.5
50	7.5	14	569	257.5	144
51	103.5	41.5	570	124	133
52	93.5	91.5	571	27.5	50.5
53	258.5	27.5	572	95	146.5
54	7.5	142.5	573	84	35.5
55	109	61	574	146.5	118
56	133	85	575	183.5	92.5
57	243.5	98	576	189	38
58	87	140	577	132	118.5
59	206.5	64	578	126	43
60	35	129	579	160.5	113.5
61	61	126.5	580	141.5	91
62	152.5	111	581	64	128.5
63	2	96.5	582	202.5	98.5
64	121	44.5	583	63	110.5
65	258.5	108	584	144.5	131.5
66	58	154	585	211	108
67	131.5	117	586	263.5	164.5
68	169	69.5	587	149.5	86
69	205	131.5	588	113	88
70	139.5	62.5	589	170	127
71	242	74.5	590	133	86.5
72	240	92	591	8.5	151
73	147	96	592	94	140.5
74	71	156	593	88	72.5
75	83.5	153	594	174	78.5
76	230.5	108.5	595	254.5	78
77	259	44.5	596	94	95.5
78	45	52.5	597	35.5	86
79	155.5	78.5	598	27.5	129
80	239	37	599	68.5	85
81	120.5	89.5	600	193	163.5
82	46.5	76.5	601	14.5	41
83	197.5	10	602	200.5	90.5
84	92.5	97	603	71	62.5
85	67	108.5	604	259.5	160
86	249.5	5.5	605	85	131
87	161.5	110.5	606	37	172.5
88	61.5	151	607	179	103
89	169	135	608	19.5	21
90	128	51	609	138	90
91	137	94.5	610	186	73.5
92	100	108	611	249.5	133
93	121.5	76	612	69.5	29
94	259.5	144	613	111.5	143
95	76	174	614	51	30.5
96	111.5	40.5	615	155	72
97	128.5	71.5	616	141	152
98	107.5	67	617	136	90
99	80.5	32	618	70.5	21
100	143	105.5	619	142.5	86.5
101	79.5	114	620	56.5	78.5
102	133	112	621	133.5	84.5
103	145.5	154	622	132.5	101
104	102.5	82	623	83	83
105	106.5	72	624	18.5	60
106	14	34.5	625	109.5	97.5
107	60.5	81.5	626	63	73.5
108	74	80	627	132.5	79
109	64	142	628	166	89
110	159	124.5	629	179.5	69.5
111	168.5	31.5	630	87.5	24
112	137.5	151	631	115.5	92
113	17.5	174	632	20.5	52.5
114	6.5	129.5	633	221.5	147
115	150.5	63	634	217.5	69.5
116	222	118.5	635	178	108
117	119	77.5	636	77.5	160.5
118	130.5	116.5	637	53	70
119	61	105.5	638	183	55.5
120	256.5	32.5	639	205	39.5
121	180.5	93.5	640	237	111.5
122	87	87.5	641	262.5	13
123	68	138	642	232.5	88
124	133.5	83	643	174	96.5
125	100.5	62	644	182.5	67
126	138	51	645	196.5	159
127	153	83.5	646	235	148.5
128	111	76	647	149.5	144.5
129	128	70	648	35	71
130	86	73	649	247	157
131	47	113.5	650	212	74
132	77	102.5	651	146.5	140
133	9.5	117.5	652	182.5	60.5
134	148	34.5	653	138	147.5
135	86	15	654	239.5	170.5
136	88.5	142	655	91	39.5
137	175	118	656	117.5	64
138	170.5	66	657	115	156
139	80	55.5	658	76	108
140	70	30	659	236.5	69
141	150.5	51.5	660	69.5	22.5
142	5	78	661	214.5	45
143	140.5	20	662	108	80.5
144	134.5	88	663	8	116
145	262.5	153	664	243.5	75
146	137.5	137.5	665	242.5	33.5
147	243	141.5	666	190.5	107.5
148	260	107.5	667	194.5	32.5
149	123	122	668	94.5	97.5
150	116	94.5	669	5	48.5
151	181	108	670	39	92.5
152	189	99	671	213.5	48
153	256	6.5	672	249.5	30.5
154	243	78	673	158	120
155	175	137	674	159	70
156	220.5	80	675	87	62.5
157	53.5	65.5	676	115.5	97.5
158	129	71	677	211	95.5
159	91.5	84	678	124	91
160	67.5	125	679	70	129
161	35.5	71.5	680	195.5	98.5
162	221	107.5	681	140	91
163	126.5	94.5	682	103.5	129
164	141	139	683	243.5	30
165	177.5	106	684	171.5	57.5
166	15.5	107.5	685	107	50
167	157	128.5	686	119	50.5
168	61	42	687	178	6
169	75.5	63	688	136	64
170	21	69.5	689	50.5	48
171	243	68	690	161	65.5
172	93	127	691	172.5	112
173	236	70.5	692	76	16
174	138.5	108	693	10	59.5
175	70.5	105.5	694	122	77
176	71	41	695	150.5	109.5
177	121.5	150	696	22	24
178	201	68.5	697	29	110
179	227	95.5	698	109	97.5
180	170.5	80	699	185.5	51
181	126.5	111.5	700	149.5	86
182	153	90	701	263.5	164.5
183	168.5	39	702	113.5	88
184	140.5	73	703	244	149
185	179.5	57.5	704	133.5	86
186	255	89.5	705	94	140
187	203.5	64	706	8.5	151
188	178	74	707	149.5	133
189	239.5	117	708	202.5	35.5
190	191	43.5	709	196	45
191	256	109.5	710	145.5	57.5
192	187.5	27.5	711	158	52
193	107	76	712	202.5	112
194	152	71	713	150.5	106.5
195	263	162	714	87	164.5
196	130	90.5	715	54	96
197	259	76	716	43.5	112.5
198	207.5	86	717	184	63.5
199	233.5	97	718	106	116.5
200	105	20.5	719	68	73
201	54.5	40	720	129	122.5
202	186	81	721	211	106.5
203	187.5	142.5	722	217.5	97
204	164.5	86	723	51	91.5
205	143	84	724	99	100
206	110	91.5	725	159	133
207	147.5	139	726	141.5	97.5
208	185.5	115	727	3.5	155
209	72	64	728	151.5	157.5
210	41.5	70	729	125.5	140.5
211	251	113	730	97.5	156.5
212	94.5	37.5	731	179.5	128.5
213	83.5	151	732	216.5	126.5
214	133	49	733	226	144
215	73.5	114	734	156.5	98
216	258	57.5	735	47.5	69.5
217	184	164.5	736	109.5	37.5
218	184	100.5	737	154.5	49
219	238	168	738	97	151
220	167	83.5	739	85.5	111
221	119	81	740	215	164.5
222	62	95	741	243.5	116.5
223	65	53.5	742	61.5	86
224	27	103.5	743	68.5	95
225	192.5	69	744	52.5	137.5
226	144.5	95.5	745	55.5	51
227	217	80	746	172	35.5
228	90.5	77	747	42.5	156
229	50	123	748	70	21
230	201.5	100.5	749	58.5	157.5
231	34.5	144.5	750	165	101.5
232	154.5	79.5	751	64.5	64
233	104	111.5	752	162.5	81
234	134.5	90	753	168	32.5
235	213	100.5	754	26.5	95.5
236	146	71.5	755	167.5	92.5
237	98	76	756	175.5	74
238	43	39.5	757	166.5	39.5
239	159.5	85.5	758	189.5	43
240	122.5	90.5	759	137.5	73
241	101.5	91	760	185	27.5
242	95.5	20.5	761	177.5	57
243	182.5	81	762	254	89.5
244	259.5	76.5	763	229	50.5
245	205	86	764	96.5	99
246	184.5	141.5	765	181.5	75
247	264	161.5	766	182.5	112
248	60.5	64	767	108	85
249	233.5	97.5	768	133	116
250	240.5	70.5	769	144.5	104
251	41	90	770	148	128
252	32	86.5	771	44	135.5
253	90.5	72	772	189	129
254	131.5	42	773	12	34.5
255	6	41.5	774	33.5	157
256	70.5	142.5	775	62	79.5
257	82	59	776	50	82.5
258	72.5	54	777	126	95
259	164.5	66	778	175	137
260	57.5	30.5	779	220.5	80
261	142.5	50.5	780	67	125
262	131.5	20	781	91	83.5
263	68	56	782	53.5	64.5
264	106	94.5	783	15	107.5
265	125.5	88.5	784	35.5	71.5
266	260	108	785	221	107.5
267	262	152.5	786	129	71.5
268	130.5	137.5	787	61.5	42.5
269	113.5	122	788	125	50.5
270	242	78	789	246	21.5
271	175.5	108	790	40.5	105.5
272	184.5	99	791	243.5	67.5
273	255.5	6.5	792	58.5	78
274	164	78.5	793	157	128
275	47.5	52.5	794	129.5	79
276	252	37.5	795	59	79
277	126.5	89.5	796	29.5	93
278	170.5	111	797	44	84
279	208	10	798	205.5	108.5
280	48.5	76	799	221.5	95.5
281	71.5	108	800	178.5	127.5
282	97	96	801	73.5	18.5
283	65.5	151	802	171.5	62.5
284	120	121.5	803	125.5	50
285	13	34.5	804	159	17.5
286	55.5	82.5	805	92.5	55.5
287	67	80	806	31	138.5
288	35.5	157	807	148.5	23.5
289	59.5	79	808	26.5	113.5
290	181.5	128	809	101.5	83.5
291	105	128.5	810	191.5	87
292	228.5	74.5	811	134.5	90.5
293	132.5	96	812	23	134
294	228.5	31.5	813	46	103.5
295	151	71	814	123	70
296	173.5	98.5	815	16	77
297	50.5	54	816	64.5	59
298	228	20.5	817	195	23
299	79	50	818	231.5	53.5
300	45.5	70	819	205.5	111
301	103.5	37.5	820	153	107.5
302	145.5	49	821	88	164
303	91.5	151	822	54.5	96
304	80.5	111.5	823	52	91.5
305	201	164.5	824	220.5	97
306	254	168	825	100.5	100
307	123.5	49	826	161.5	133
308	89	35	827	143.5	96.5
309	142	98	828	3.5	155
310	157	151	829	178	70
311	120	90.5	830	82.5	114
312	89	164.5	831	148	74
313	129	98.5	832	100	48.5
314	54.5	99.5	833	55.5	147.5
315	245	74.5	834	73.5	90.5
316	91	91.5	835	177.5	132
317	244.5	45	836	206	36
318	218	132.5	837	166	63
319	221	37.5	838	75	21
320	6.5	137.5	839	250	128.5
321	8	108.5	840	155.5	156.5
322	227	120	841	96	163.5
323	36	139	842	122.5	38.5
324	8.5	126	843	129.5	73
325	253	136	844	52.5	50.5
326	4	142.5	845	128	33
327	139	174	846	28	91
328	48	141	847	74	19.5
329	59	94.5	848	116.5	46.5
330	118	64.5	849	162	115
331	233	57	850	222.5	130
332	143.5	128	851	123.5	98
333	165.5	72	852	222	39
334	54	37.5	853	48	69.5
335	96.5	13.5	854	109.5	37
336	168	9	855	154	49
337	162	53.5	856	97	151
338	12	66.5	857	213	164
339	138.5	10	858	85	111
340	151.5	83.5	859	261	162.5
341	107	39.5	860	46	93.5
342	152.5	36.5	861	95	105.5
343	144	64.5	862	193.5	102.5
344	69	76	863	61.5	162
345	146.5	112	864	133	75.5
346	241.5	110.5	865	12.5	81.5
347	217.5	27	866	121	94.5
348	177.5	39	867	117	122
349	75.5	144.5	868	103.5	49.5
350	122.5	19.5	869	193.5	57
351	73	84.5	870	41.5	174
352	194.5	138	871	199.5	91.5
353	243	52.5	872	171.5	118
354	220	103.5	873	174.5	115
355	44	70	874	179	59
356	49	25	875	259	93.5
357	238	78	876	162	93.5
358	185	72	877	166.5	112.5
359	191.5	54	878	174	93.5
360	23	79	879	128.5	94.5
361	10	83	880	226.5	80.5
362	58	91.5	881	92.5	83.5
363	122.5	93.5	882	179	137
364	215	68	883	34.5	72
365	25	78	884	53.5	64.5
366	65.5	17	885	13.5	107.5
367	190.5	62.5	886	144	139
368	103.5	33	887	61	41.5
369	128	54	888	67.5	125
370	39.5	155	889	19.5	69
371	55.5	15	890	227	107.5
372	22.5	54	891	127	50.5
373	70	88	892	253	21.5
374	78	14	893	40	106
375	31	108.5	894	203.5	119
376	207	40.5	895	104	104.5
377	155.5	137	896	69	42.5
378	144	135.5	897	75.5	113.5
379	245.5	160	898	129	84.5
380	69.5	149	899	128	93
381	57	101.5	900	179.5	103.5
382	194	56.5	901	154	77
383	167.5	138.5	902	178	69.5
384	64	94.5	903	108.5	135.5
385	185.5	72	904	175.5	132
386	49.5	100	905	69	91
387	82.5	91	906	130	120
388	222	74	907	246.5	26
389	221.5	45	908	62	97.5
390	256	135.5	909	198	30
391	6	137	910	237.5	39.5
392	266.5	102.5	911	209	36
393	196.5	133	912	255	128.5
394	200.5	37	913	156.5	156.5
395	193	140.5	914	74	21.5
396	26.5	43	915	168	63
397	130.5	35.5	916	155.5	115
398	169.5	35	917	220	130.5
399	137.5	41.5	918	218.5	39
400	144.5	112	919	120	99.5
401	71	85	920	111	90
402	74	145	921	129.5	82.5
403	238	110.5	922	81.5	85.5
404	214	27	923	129.5	117
405	191.5	138	924	192.5	42.5
406	175	39.5	925	210.5	100.5
407	252	35.5	926	190	95.5
408	120.5	16.5	927	187	74.5
409	92	147	928	59.5	39
410	21	50.5	929	84	110
411	80.5	35.5	930	200.5	98.5
412	132.5	118.5	931	130.5	38.5
413	188	94	932	137.5	73
414	147.5	118	933	79	20
415	126	43	934	55.5	50.5
416	160.5	118	935	30	91
417	194	40.5	936	136	116
418	181.5	72	937	173.5	97
419	59	38	938	171	120
420	106	13.5	939	55.5	89
421	151	10	940	117.5	122
422	255	87	941	173	115
423	13.5	66.5	942	104.5	49.5
424	257.5	102.5	943	121.5	94.5
425	262.5	75	944	192.5	57
426	184	9	945	45	174.5
427	247	48	946	170	118
428	204	48	947	255.5	93.5
429	116.5	137	948	198	91
430	70	91	949	177.5	59
431	103	89	950	25.5	129
432	199	57	951	134.5	140.5
433	209.5	78	952	149.5	85
434	170	65.5	953	238.5	119
435	92	110	954	125	105
436	190	72	955	81	42.5
437	182.5	87.5	956	104.5	75.5
438	87.5	98	957	149	86.5
439	75	24.5	958	147	99
440	176.5	70	959	142	116
441	222.5	147	960	95	84
442	106.5	92.5	961	85	84
443	64.5	160.5	962	65.5	114
444	218	69.5	963	133.5	84.5
445	174.5	107.5	964	131	93.5
446	37	70	965	197	105
447	10	51	966	194.5	69.5
448	180	61.5	967	165	77
449	93	135	968	139	91.5
450	144	130.5	969	210.5	31
451	204.5	34.5	970	184.5	98
452	237.5	112.5	971	209	170.5
453	251.5	40	972	80	67.5
454	117.5	132.5	973	156.5	76
455	259	78	974	12	52.5
456	191.5	164	975	112.5	22.5
457	200.5	90.5	976	207.5	64.5
458	83.5	96	977	34	101.5
459	19	86	978	246	64.5
460	176.5	103.5	979	235.5	108
461	58	63	980	122	73.5
462	10.5	130	981	227.5	86
463	55	85	982	164	6
464	73	131	983	167.5	46
465	131.5	90	984	263	57.5
466	254	133	985	197	35
467	262	159.5	986	77	161
468	3	40.5	987	114	132.5
469	7	23	988	162.5	106
470	36	30.5	989	122.5	87.5
471	21	172.5	990	109.5	80
472	102.5	142	991	117.5	47.5
473	56.5	29	992	22.5	171.5
474	150.5	72.5	993	132	120.5
475	183.5	73.5	994	247	26
476	43.5	51	995	198	30.5
477	135.5	151.5	996	238.5	39.5
478	126	149.5	997	65.5	97
479	238	32	998	203.5	4.5
480	89.5	95	999	253	92.5
481	158	85.5	1000	226.5	114.5
482	122.5	79	1001	140	34
483	110.5	60	1002	253.5	13
484	57	78.5	1003	213.5	124
485	133.5	84	1004	143.5	48.5
486	133	101	1005	210.5	69.5
487	149	121.5	1006	191.5	139
488	49	71	1007	40.5	116
489	66.5	129	1008	71	161
490	140.5	90.5	1009	112	132.5
491	199.5	98.5	1010	121	87.5
492	136	89	1011	165.5	106.5
493	70.5	20.5	1012	88.5	82.5
494	53	106	1013	34.5	19.5
495	194.5	78.5	1014	116.5	112.5
496	212.5	131.5	1015	55	58.5
497	141.5	16.5	1016	127.5	91.5
498	140.5	49.5	1017	151.5	156
499	134.5	40.5	1018	66.5	103
500	207	68.5	1019	35	134
501	129.5	68.5	1020	230.5	83
502	105.5	106.5	1021	54	84
503	76.5	133.5	1022	135	118.5
504	94.5	77.5	1023	40.5	116
505	220	92	1024	86.5	82
506	128.5	96.5	1025	125	91.5
507	102.5	22	1026	54.5	58.5
508	42	96.5	1027	113.5	111.5
509	139.5	20.5	1028	34	19.5
510	69.5	35	1029	148	156
511	44.5	78	1030	65.5	103
512	78	111.5	1031	34	134.5
513	111.5	92.5	1032	225.5	83
514	162.5	71.5	1033	53.5	84
515	149	116	1034	175.5	102.5
516	107.5	133.5	1035	132	118
517	103.5	101	1036	233.5	83.5
518	82	151	1037	159.5	165.5
519	170	53.5

## Sheet: (3) Apple Maturity
(3) Apple Maturity
Number	X	Y	Maturity
1	1	1	115.155
2	1	2	119.415
3	1	3	52.2872
4	1	4	72.3822
5	1	5	36.5847
6	2	1	115.155
7	2	2	119.415
8	2	3	52.2872
9	2	4	72.3822
10	2	5	36.5847
11	3	1	119.898
12	3	2	127.675
13	3	3	113.731
14	3	4	125.026
15	3	5	149.148
16	3	6	115.118
17	4	1	79.5718
18	4	2	61.6233
19	4	3	60.7161
20	4	4	48.7671
21	4	5	62.9256
22	4	6	62.1199
23	4	7	62.6471
24	4	8	72.0661
25	4	9	50.8583
26	4	10	59
27	4	11	45.2483
28	5	1	51.3764
29	5	2	13.6179
30	5	3	89.7
31	5	4	94.5089
32	5	5	54.8583
33	5	6	69.8937
34	5	7	70.144
35	5	8	55.7411
36	5	9	19.7971
37	6	1	19.5405
38	6	2	29.7078
39	6	3	43.4838
40	6	4	29.007
41	6	5	50.1728
42	6	6	30.1489
43	6	7	36.2227
44	6	8	44.8162
45	7	1	100.571
46	7	2	106.588
47	7	3	107.014
48	7	4	87.5326
49	7	5	140.368
50	7	6	142.113
51	7	7	105.226
52	7	8	109.402
53	7	9	127.614
54	7	10	41.4196
55	7	11	73.0432
56	7	12	61.1227
57	7	13	116.851
58	7	14	93.3333
59	7	15	60.5738
60	7	16	92.2222
61	7	17	89.8296
62	7	18	109.07
63	7	19	76.8889
64	7	20	84.4619
65	7	21	125.263
66	7	22	36.2131
67	8	1	29.1292
68	8	2	20.0656
69	9	1	54.8171
70	9	2	72.3691
71	9	3	113.314
72	9	4	86.4271
73	9	5	80.8226
74	9	6	107.911
75	9	7	123.673
76	9	8	102.401
77	9	9	76.38
78	12	1	32.25
79	12	2	19.7943
80	12	3	45.5159
81	12	4	28.8592
82	12	5	17.4504
83	12	6	31.7632
84	12	7	30.3597
85	12	8	14.3662
86	12	9	25.8656
87	12	10	28.8019
88	12	11	21.9571
89	13	1	144.711
90	13	2	139.413
91	13	3	138.962
92	13	4	74.4275
93	13	5	101.5
94	13	6	114.613
95	13	7	150.846
96	14	1	26.5709
97	14	2	32.1791
98	14	3	23.752
99	14	4	40.7952
100	14	5	25.031
101	14	6	21.1235
102	14	7	27.1472
103	14	8	16.3417
104	14	9	23.2311
105	14	10	25.0165
106	15	1	100.197
107	15	2	57.5306
108	15	3	59.9091
109	16	1	102.213
110	16	2	76.2964
111	16	3	101.118
112	16	4	94.8413
113	16	5	112.581
114	16	6	97.3952
115	17	1	99.645
116	17	2	75.9111
117	17	3	117.579
118	17	4	70.5378
119	18	1	84.7141
120	20	1	124.425
121	20	2	108.614
122	20	3	123.741
123	20	4	99.8167
124	20	5	134.356
125	20	6	102.425
126	20	7	109.76
127	20	8	132.331
128	21	1	88.589
129	21	2	38.0958
130	22	1	70.3229
131	22	2	69.0233
132	22	3	25.9148
133	22	4	87.4105
134	22	5	79.467
135	22	6	69.5451
136	22	7	31.2222
137	23	1	95.3442
138	24	1	26.8562
139	24	2	48.1214
140	24	3	32.3611
141	24	4	46.0045
142	24	5	14.3438
143	24	6	71.9627
144	24	7	68.5239
145	24	8	50.7722
146	24	9	51.0677
147	24	10	52.5952
148	24	11	64.0145
149	24	12	51.3194
150	24	13	52.6091
151	24	14	48.2822
152	24	15	47.9539
153	24	16	42.1971
154	24	17	49.5174
155	25	1	107.875
156	25	2	115.154
157	25	3	102.08
158	25	4	117.348
159	25	5	108.608
160	25	6	150.59
161	25	7	136.813
162	25	8	130.45
163	25	9	160.964
164	25	10	65.2222
165	25	11	95.3238
166	25	12	130.227
167	25	13	57.5476
168	25	14	127.299
169	25	15	121.658
170	25	16	129.262
171	25	17	65.9439
172	26	1	67.2
173	26	2	30.2686
174	26	3	29.8816
175	27	1	33.7366
176	27	2	64.6822
177	27	3	62.7519
178	27	4	111.297
179	27	5	72.2674
180	29	1	142.259
181	29	2	132.821
182	29	3	116.92
183	30	1	45.0625
184	30	2	67.9295
185	30	3	64.697
186	30	4	15.0167
187	30	5	44.6923
188	30	6	9.875
189	30	7	13.1556
190	30	8	28.9011
191	30	9	13.2889
192	30	10	21.1212
193	32	1	19.2531
194	32	2	22.059
195	32	3	107.561
196	32	4	14.2353
197	32	5	26.1728
198	32	6	23.9808
199	32	7	23.5915
200	32	8	38.2944
201	32	9	19.5254
202	32	10	13.683
203	32	11	16.2706
204	32	12	20.3856
205	32	13	24.3519
206	32	14	16.2132
207	32	15	20.2933
208	32	16	25.35
209	32	17	18.5861
210	33	1	126.226
211	33	2	89.909
212	33	3	135.395
213	33	4	111.612
214	33	5	113.221
215	33	6	128.911
216	33	7	89.8542
217	33	8	117.36
218	33	9	85.2763
219	33	10	127.933
220	34	1	124.417
221	34	2	152.485
222	34	3	120.776
223	34	4	134.183
224	34	5	126.765
225	34	6	116.76
226	34	7	121.867
227	35	1	23.0682
228	35	2	41.6677
229	35	3	62.5517
230	35	4	62.1714
231	35	5	71.9389
232	37	1	143.449
233	37	2	135.075
234	37	3	117.798
235	38	1	68.0059
236	39	1	14.4967
237	39	2	18.4083
238	39	3	26.6733
239	39	4	18.2601
240	39	5	14.4325
241	39	6	13.6176
242	39	7	41.6149
243	39	8	11.4042
244	39	9	24.1142
245	39	10	17.4583
246	39	11	26.3498
247	39	12	129.481
248	39	13	17.1534
249	39	14	27.4654
250	40	1	44.1067
251	41	1	18.462
252	41	2	17.3286
253	41	3	13.7545
254	41	4	20.0833
255	41	5	45.0343
256	41	6	12.8606
257	41	7	13.675
258	41	8	17.5889
259	42	1	26.076
260	42	2	35.4303
261	42	3	51.8427
262	42	4	69.2242
263	42	5	55.9628
264	42	6	53.7855
265	42	7	67.5714
266	42	8	63.5303
267	42	9	53.4314
268	42	10	59.7569
269	42	11	45.9133
270	42	12	43.3563
271	42	13	44.5018
272	42	14	48.7619
273	42	15	33.1176
274	44	1	27.9414
275	44	2	31.5793
276	44	3	42.7063
277	44	4	21.4838
278	44	5	26.5873
279	44	6	32.9806
280	44	7	19.1801
281	44	8	14.434
282	44	9	24.6193
283	44	10	21.0095
284	44	11	20.3
285	45	1	100.232
286	45	2	57.6242
287	45	3	59.3111
288	45	4	99.3476
289	47	1	21.7125
290	47	2	17.8685
291	47	3	8.54631
292	47	4	29.7507
293	47	5	19.5364
294	47	6	20.0602
295	47	7	8.44494
296	48	1	35.2469
297	48	2	81.2614
298	48	3	98.4221
299	48	4	87.3417
300	49	1	128.132
301	49	2	133.758
302	49	3	119.469
303	49	4	108.44
304	49	5	129.488
305	49	6	121.777
306	49	7	130.857
307	50	1	14.4812
308	50	2	46.7102
309	50	3	29.761
310	50	4	22.9572
311	50	5	24.0491
312	50	6	20.672
313	50	7	29.7175
314	51	1	28.6027
315	51	2	34.1435
316	51	3	29.5817
317	51	4	31.0207
318	51	5	38.1044
319	51	6	29.2708
320	51	7	33.3032
321	52	1	125.732
322	52	2	107.266
323	52	3	82.8571
324	52	4	62.0057
325	52	5	87.9071
326	52	6	15.625
327	52	7	27.7098
328	52	8	79.5204
329	56	1	26.3151
330	56	2	19.0875
331	56	3	21.3008
332	56	4	26.6411
333	57	1	33.0078
334	57	2	43.3713
335	57	3	30.0331
336	57	4	12.9375
337	57	5	53.6474
338	57	6	12.1273
339	57	7	33.8158
340	57	8	24.787
341	58	1	21.2996
342	58	2	27.4832
343	60	1	76.9025
344	60	2	77.7439
345	61	1	127.991
346	61	2	111.049
347	61	3	125.772
348	61	4	118.449
349	61	5	96.3812
350	61	6	128.599
351	61	7	67.4665
352	61	8	75.6212
353	63	1	84.48
354	63	2	102.552
355	65	1	14.2083
356	67	1	114.571
357	67	2	76.6823
358	67	3	114.643
359	67	4	12.6833
360	67	5	92.9286
361	67	6	86.25
362	67	7	31.0455
363	67	8	74.4745
364	67	9	11.9875
365	67	10	65.282
366	67	11	39.4028
367	68	1	160.227
368	68	2	124.097
369	68	3	137.947
370	69	1	16.362
371	69	2	18.708
372	69	3	17.6711
373	69	4	10.472
374	69	5	12.2136
375	69	6	16.158
376	69	7	30.0553
377	69	8	13.336
378	69	9	11.0615
379	69	10	14.4231
380	69	11	15.0833
381	69	12	9.25974
382	69	13	19.0471
383	69	14	10.1588
384	69	15	14.3639
385	69	16	12.1565
386	70	1	28.8605
387	70	2	29.7674
388	70	3	34.012
389	70	4	30.8624
390	70	5	35.7769
391	70	6	32.3542
392	70	7	35.2632
393	70	8	37.5786
394	70	9	28.6672
395	70	10	37.3672
396	70	11	35.2447
397	71	1	45.5354
398	71	2	24.15
399	71	3	7.22222
400	72	1	128.255
401	72	2	69.6324
402	72	3	95.8333
403	72	4	111.3
404	72	5	126.251
405	72	6	76.3871
406	72	7	127.177
407	72	8	74.9795
408	72	9	140.194
409	73	1	92.9934
410	73	2	38.5354
411	73	3	76.8008
412	73	4	50.1512
413	73	5	25.9788
414	73	6	53.215
415	73	7	126.744
416	73	8	58.3378
417	73	9	74.5314
418	74	1	27.532
419	74	2	43.5648
420	74	3	34.1515
421	74	4	43.52
422	74	5	21.3889
423	74	6	8.58678
424	74	7	5.52893
425	74	8	10.4455
426	74	9	25.2847
427	74	10	16.7431
428	74	11	13.4375
429	75	1	40.7834
430	75	2	38.9263
431	75	3	39.6588
432	75	4	40.1681
433	75	5	38.9355
434	75	6	39.3738
435	75	7	38.0722
436	75	8	40.7371
437	75	9	38.4388
438	75	10	40.0519
439	76	1	97.6341
440	76	2	142.025
441	76	3	135.991
442	76	4	70.232
443	76	5	123.121
444	76	6	64.4866
445	76	7	97.4489
446	76	8	99.9514
447	76	9	83.6319
448	77	1	57.7155
449	77	2	75.519
450	77	3	50.501
451	77	4	17.9482
452	77	5	18.6533
453	77	6	28.5836
454	77	7	62.2881
455	78	1	71.7409
456	78	2	27.58
457	78	3	41.3684
458	78	4	23.1
459	78	5	56.2781
460	78	6	36.6399
461	78	7	31.1667
462	78	8	21.0493
463	78	9	37.5386
464	78	10	23.9545
465	78	11	22.4958
466	78	12	26.0219
467	78	13	21.4662
468	78	14	69.0513
469	78	15	30.0675
470	78	16	45.098
471	78	17	19.8235
472	78	18	25.869
473	78	19	16.5423
474	78	20	22.0248
475	78	21	28.0174
476	78	22	33.5795
477	81	1	9.26573
478	81	2	24.2182
479	81	3	20.1
480	82	1	29.0306
481	82	2	33.4245
482	82	3	29.1824
483	82	4	25.4683
484	83	1	11.1143
485	83	2	19.625
486	83	3	21.69
487	83	4	17.4107
488	83	5	14
489	84	1	59.3799
490	84	2	80.8182
491	84	3	94.5793
492	85	1	53.4951
493	85	2	25.4978
494	88	1	71.3095
495	88	2	73.9041
496	88	3	42.1009
497	88	4	108.381
498	88	5	100.938
499	88	6	89.7623
500	88	7	76.9913
501	88	8	46.9007
502	88	9	84.907
503	88	10	94.0637
504	89	1	64.2773
505	89	2	41.2782
506	89	3	120.106
507	89	4	26.1884
508	89	5	33.2003
509	89	6	31.1787
510	89	7	25.0237
511	91	1	34.0057
512	91	2	32.8272
513	91	3	31.4514
514	91	4	33.7363
515	91	5	34.9266
516	91	6	39.0676
517	91	7	37.5878
518	92	1	44.9615
519	92	2	32.9822
520	92	3	22.4111
521	92	4	32.306
522	92	5	19.6889
523	92	6	24.9835
524	92	7	15.175
525	92	8	31.8648
526	94	1	91.6818
527	94	2	70.1003
528	94	3	75.7239
529	96	1	74.639
530	96	2	26.829
531	97	1	112.355
532	97	2	117.384
533	98	1	117.073
534	98	2	110.685
535	98	3	73.8856
536	98	4	74.8132
537	98	5	116.812
538	98	6	90.9713
539	98	7	73.9444
540	98	8	87.8236
541	100	1	79.3022
542	100	2	52.5911
543	100	3	49.6529
544	100	4	51.6129
545	100	5	72.7619
546	100	6	72.8298
547	100	7	81.5336
548	100	8	67.7071
549	100	9	30.8179
550	100	10	64.2992
551	100	11	59.6962
552	101	1	79.3022
553	101	2	52.5911
554	101	3	49.6529
555	101	4	51.6129
556	101	5	72.7619
557	101	6	72.8298
558	101	7	81.5336
559	101	8	67.7071
560	101	9	30.8179
561	101	10	64.2992
562	101	11	59.6962
563	102	1	51.9939
564	102	2	76.5113
565	102	3	19.1718
566	102	4	28.9811
567	102	5	18.4381
568	102	6	45.0166
569	102	7	16.6411
570	102	8	59.84
571	103	1	42.3583
572	103	2	97.148
573	103	3	74.0448
574	103	4	53.1578
575	103	5	17.7565
576	103	6	80.612
577	103	7	51.4365
578	103	8	131.824
579	103	9	69.8065
580	104	1	74.3507
581	104	2	55.8412
582	104	3	90.2761
583	106	1	29.6156
584	106	2	21.0071
585	106	3	20.282
586	107	1	22.6167
587	107	2	29.7285
588	107	3	25.4006
589	107	4	36.1832
590	107	5	29.7047
591	107	6	47.1216
592	107	7	46.3929
593	108	1	92.4402
594	108	2	70.6655
595	109	1	63.0804
596	109	2	24.4683
597	109	3	62.5221
598	109	4	20.6985
599	109	5	35.7786
600	109	6	29.502
601	109	7	52.0735
602	109	8	39.8141
603	109	9	36.8676
604	109	10	24.7368
605	109	11	25.625
606	109	12	21.4147
607	109	13	34.608
608	109	14	31.6206
609	109	15	24.1406
610	109	16	29.9466
611	109	17	36.5263
612	109	18	20.848
613	109	19	24.3333
614	109	20	37.0074
615	109	21	21.3194
616	109	22	25.7188
617	110	1	53.3661
618	110	2	25.283
619	111	1	51.446
620	113	1	10.4444
621	113	2	19.9506
622	113	3	23.4455
623	113	4	21.3333
624	113	5	16.0238
625	114	1	31.6939
626	115	1	17.5
627	115	2	100.07
628	115	3	54.3472
629	116	1	142.024
630	116	2	103.048
631	116	3	65.7074
632	116	4	76.9875
633	116	5	134.897
634	116	6	59.3746
635	116	7	98.5491
636	116	8	123.778
637	116	9	95.1032
638	118	1	77.6714
639	118	2	16.1667
640	118	3	26.1593
641	118	4	33.7885
642	118	5	14.3952
643	118	6	41.1667
644	118	7	34.2846
645	118	8	31.7424
646	118	9	93.0065
647	118	10	43
648	118	11	32.2917
649	118	12	42.6548
650	118	13	23.0714
651	118	14	22.5
652	118	15	55.4871
653	118	16	51.6222
654	118	17	66.0044
655	119	1	43.659
656	119	2	35.0262
657	119	3	126.969
658	119	4	101.889
659	119	5	51.6891
660	119	6	39.9231
661	119	7	108.799
662	119	8	94.2124
663	119	9	27.1979
664	121	1	110.548
665	121	2	91.907
666	121	3	99.9635
667	121	4	116.07
668	121	5	87.7957
669	121	6	95.644
670	122	1	80.8181
671	122	2	51.6391
672	122	3	41.8441
673	122	4	72.6719
674	122	5	48.9911
675	122	6	75.5595
676	122	7	81.2441
677	122	8	66.8392
678	122	9	63.866
679	124	1	63.6053
680	124	2	96.46
681	124	3	82.2202
682	126	1	45.8492
683	126	2	25.3254
684	126	3	44.481
685	126	4	22.1094
686	126	5	20.9643
687	126	6	22.1667
688	126	7	12.8958
689	126	8	23.3194
690	126	9	12.5769
691	126	10	38.0702
692	126	11	27.8194
693	128	1	122.125
694	128	2	97.3167
695	128	3	99.3967
696	128	4	92.49
697	128	5	140.89
698	129	1	33
699	129	2	25
700	130	1	30.1697
701	130	2	19.7912
702	130	3	25.8817
703	130	4	44.3726
704	130	5	29.2999
705	130	6	43.4676
706	130	7	44.8451
707	131	1	35.9848
708	131	2	25.3026
709	131	3	29.5536
710	131	4	42.2308
711	131	5	40.2143
712	132	1	91.885
713	132	2	48.9941
714	132	3	33.548
715	132	4	41.9212
716	132	5	30.8195
717	133	1	8.05357
718	133	2	15.919
719	133	3	19.7545
720	133	4	8.82857
721	133	5	16.8529
722	134	1	116.769
723	134	2	125.984
724	134	3	83.1911
725	134	4	97.2489
726	134	5	104.435
727	134	6	103.827
728	135	1	79.7141
729	138	1	112.159
730	139	1	31.1831
731	139	2	42.2
732	139	3	57.3333
733	139	4	40.4594
734	139	5	52.2059
735	140	1	122.522
736	140	2	137.286
737	140	3	109.707
738	140	4	106.891
739	140	5	127.586
740	140	6	120.517
741	141	1	27.4821
742	141	2	19.9167
743	141	3	19.25
744	141	4	26.7026
745	141	5	29.1389
746	141	6	22.6273
747	141	7	41.9087
748	141	8	92.3403
749	141	9	78.7846
750	142	1	27.833
751	142	2	38.3852
752	142	3	47.961
753	142	4	5.19231
754	142	5	18.6768
755	142	6	37.7212
756	143	1	7.80909
757	143	2	47.1869
758	143	3	29.891
759	143	4	59.891
760	143	5	39.2803
761	143	6	60.9
762	143	7	16.7324
763	143	8	42.3714
764	143	9	18.0694
765	144	1	35.1836
766	144	2	34.2266
767	144	3	34.0612
768	144	4	32.6711
769	144	5	37.8322
770	144	6	31.6191
771	144	7	35.2609
772	144	8	36.0757
773	146	1	100.565
774	146	2	73.0762
775	146	3	61.8118
776	146	4	55.6645
777	147	1	136.184
778	147	2	104.535
779	147	3	121.342
780	147	4	140.367
781	147	5	120.814
782	147	6	113.2
783	147	7	134.717
784	147	8	115.782
785	147	9	133.85
786	147	10	110.908
787	147	11	126.716
788	147	12	114.944
789	147	13	129.265
790	147	14	126.427
791	147	15	65.9333
792	147	16	72.8429
793	147	17	56.6339
794	148	1	112.117
795	148	2	58.9452
796	148	3	61.0503
797	148	4	53.4066
798	148	5	91.4697
799	148	6	111.606
800	148	7	106.385
801	149	1	60.4578
802	149	2	56.3287
803	149	3	45.0833
804	149	4	74.3524
805	149	5	59.4756
806	149	6	65.9704
807	149	7	16.202
808	149	8	70.6356
809	151	1	18.7382
810	151	2	23.2627
811	152	1	28.2344
812	152	2	43.5709
813	152	3	48.6602
814	152	4	21.5936
815	152	5	31.4609
816	152	6	25.8559
817	152	7	12.1946
818	152	8	29.7214
819	153	1	92.2816
820	153	2	48.3973
821	153	3	32.2029
822	153	4	41.8748
823	154	1	125.627
824	154	2	116.252
825	154	3	82.9347
826	154	4	97.0936
827	154	5	103.839
828	154	6	107.122
829	156	1	33.5906
830	156	2	35.7183
831	156	3	36.0692
832	156	4	36.3333
833	156	5	37.6085
834	158	1	24.8998
835	158	2	101.332
836	159	1	22.1834
837	159	2	18.8368
838	159	3	25.7075
839	159	4	26.5782
840	159	5	19.2652
841	159	6	20.7527
842	160	1	46.9081
843	160	2	45.6213
844	160	3	18.3568
845	160	4	65.0062
846	160	5	40.975
847	160	6	51.085
848	160	7	19.2261
849	161	1	149.48
850	161	2	148.318
851	161	3	119.48
852	161	4	156.151
853	162	1	122.222
854	162	2	136.646
855	162	3	109.808
856	162	4	105.07
857	162	5	115.536
858	162	6	126.824
859	162	7	100.465
860	163	1	35.0415
861	163	2	40.71
862	163	3	48.0795
863	163	4	72.8704
864	163	5	25.293
865	163	6	22.32
866	164	1	48.5882
867	164	2	42.3302
868	164	3	31.2899
869	164	4	55.069
870	164	5	43.6339
871	164	6	38.9273
872	164	7	32.5784
873	164	8	43.9348
874	164	9	66.4375
875	164	10	40.2821
876	167	1	57.6182
877	167	2	36.4824
878	167	3	18.1273
879	168	1	141.351
880	168	2	113.709
881	168	3	120.627
882	168	4	89.5556
883	168	5	124.742
884	168	6	111.396
885	168	7	137.188
886	168	8	67.0694
887	168	9	137.941
888	168	10	152.162
889	168	11	135.895
890	168	12	135.2
891	168	13	114.3
892	168	14	131.007
893	168	15	131.955
894	169	1	107.274
895	169	2	63.854
896	169	3	83.6854
897	172	1	100.82
898	172	2	103.896
899	172	3	65.9506
900	172	4	48.6821
901	172	5	74.8664
902	172	6	74.8259
903	172	7	44.1487
904	173	1	101.469
905	173	2	27.2573
906	174	1	132.628
907	174	2	85.6104
908	174	3	85.494
909	174	4	66.3222
910	174	5	54.474
911	175	1	26.5815
912	175	2	26.8264
913	175	3	19.2692
914	175	4	24.3629
915	175	5	18.8773
916	176	1	149.241
917	176	2	148.517
918	176	3	155.645
919	176	4	140.256
920	177	1	13.1076
921	177	2	17.3008
922	177	3	19.8731
923	177	4	15.3346
924	177	5	25.1955
925	177	6	21.6348
926	177	7	16.1196
927	177	8	31.1211
928	177	9	22.0455
929	177	10	30
930	177	11	22.3916
931	178	1	46.8112
932	178	2	47.8015
933	178	3	49.7844
934	178	4	22.7704
935	178	5	40.8444
936	179	1	43.6448
937	179	2	41.4074
938	179	3	38.648
939	179	4	47.9087
940	180	1	42.0556
941	180	2	40.5524
942	180	3	28.0533
943	180	4	57.5606
944	180	5	53.0643
945	180	6	31.9471
946	180	7	27.8125
947	180	8	41.0271
948	180	9	42.8457
949	180	10	59.9231
950	180	11	35.8
951	180	12	14.6263
952	180	13	20.2909
953	181	1	103.397
954	181	2	66.5066
955	181	3	79.9419
956	181	4	65.5748
957	182	1	32.8824
958	182	2	34.2483
959	182	3	35.58
960	182	4	35.1431
961	182	5	36.1713
962	183	1	99.747
963	183	2	103.329
964	183	3	66.1581
965	183	4	46.8349
966	183	5	74.3918
967	183	6	73.3906
968	184	1	29.1674
969	184	2	30.8109
970	185	1	57.2083
971	185	2	36.15
972	187	1	50.7363
973	187	2	77.7727
974	187	3	22.1618
975	187	4	78.5079
976	187	5	33.3501
977	187	6	61.8804
978	187	7	22.5219
979	187	8	56.106
980	187	9	40.987
981	187	10	52.79
982	187	11	23.9107
983	187	12	42.4067
984	187	13	46.1096
985	187	14	38.675
986	188	1	28.8455
987	188	2	30.8732
988	188	3	29.3958
989	188	4	24.4899
990	189	1	33.4957
991	189	2	30.4329
992	189	3	30.9874
993	190	1	132.518
994	190	2	73.4477
995	190	3	69.3553
996	190	4	59.8547
997	190	5	87.1711
998	190	6	31.9179
999	192	1	13.8117
1000	192	2	13.2923
1001	192	3	10.8631
1002	192	4	10.2917
1003	192	5	14.6077
1004	192	6	11.0864
1005	192	7	12.7778
1006	192	8	8.27692
1007	194	1	64.5545
1008	195	1	29.064
1009	195	2	30.8877
1010	195	3	24.4629
1011	195	4	29.6697
1012	196	1	28.1639
1013	196	2	32.1826
1014	196	3	29.9875
1015	196	4	28.7129
1016	196	5	30.9381
1017	196	6	28.6875
1018	196	7	28.3647
1019	196	8	28.4531
1020	196	9	30.2026
1021	196	10	27.0045
1022	196	11	32.2143
1023	198	1	64.5545
1024	200	1	28.0979
1025	200	2	30.6993
1026	200	3	28.3547
1027	200	4	29.2907
1028	200	5	32.1558
1029	200	6	29.275
1030	200	7	28.4589
1031	200	8	27.625
1032	200	9	30.7202
1033	200	10	27.4889
1034	200	11	30.9949
1035	200	12	32.2202
1036	200	13	31.4897
1037	200	14	29.5644

## Sheet: (4) Apple Quality
(4) Apple Weight
Number	X	Y	Area	Weight
1	1	1	2596.72	273.951
2	2	1	6221.14	656.321
3	3	1	1418.63	149.663
4	4	1	176.715	18.6431
5	5	1	881.413	92.9878
6	1	2	2596.72	273.951
7	2	2	6221.14	656.321
8	3	2	1418.63	149.663
9	4	2	176.715	18.6431
10	5	2	881.413	92.9878
11	1	3	254.469	26.8461
12	2	3	2375.83	250.647
13	3	3	551.546	58.1873
14	4	3	2596.72	273.951
15	5	3	143.139	15.1009
16	6	3	6151.43	648.968
17	1	4	683.493	72.1075
18	2	4	683.493	72.1075
19	3	4	881.413	92.9878
20	4	4	779.311	82.2162
21	5	4	706.858	74.5726
22	6	4	637.94	67.3017
23	7	4	551.546	58.1873
24	8	4	530.929	56.0123
25	9	4	471.435	49.7358
26	10	4	380.133	40.1035
27	11	4	471.435	49.7358
28	1	5	1134.11	119.648
29	2	5	683.493	72.1075
30	3	5	683.493	72.1075
31	4	5	660.52	69.6839
32	5	5	1164.16	122.817
33	6	5	989.798	104.422
34	7	5	490.874	51.7865
35	8	5	989.798	104.422
36	9	5	551.546	58.1873
37	1	6	452.389	47.7264
38	2	6	1486.17	156.789
39	3	6	637.94	67.3017
40	4	6	1134.11	119.648
41	5	6	471.435	49.7358
42	6	6	2780.51	293.339
43	7	6	804.248	84.847
44	8	6	779.311	82.2162
45	1	7	397.608	41.9471
46	2	7	510.705	53.8787
47	3	7	226.98	23.9461
48	4	7	433.736	45.7585
49	5	7	213.825	22.5582
50	6	7	240.528	25.3754
51	7	7	452.389	47.7264
52	8	7	132.732	14.0031
53	9	7	452.389	47.7264
54	10	7	113.097	11.9316
55	11	7	254.469	26.8461
56	12	7	346.361	36.5406
57	13	7	433.736	45.7585
58	14	7	283.529	29.9119
59	15	7	330.064	34.8212
60	16	7	113.097	11.9316
61	17	7	213.825	22.5582
62	18	7	240.528	25.3754
63	19	7	33.1831	3.50077
64	20	7	165.13	17.421
65	21	7	330.064	34.8212
66	22	7	283.529	29.9119
67	1	8	8091.37	853.628
68	2	8	1924.42	203.024
69	1	9	829.577	87.5192
70	2	9	1194.59	126.028
71	3	9	1352.65	142.703
72	4	9	3318.31	350.077
73	5	9	380.133	40.1035
74	6	9	2827.43	298.29
75	7	9	1555.28	164.08
76	8	9	1194.59	126.028
77	9	9	397.608	41.9471
78	1	12	551.546	58.1873
79	2	12	415.476	43.8321
80	3	12	346.361	36.5406
81	4	12	380.133	40.1035
82	5	12	452.389	47.7264
83	6	12	268.803	28.3583
84	7	12	397.608	41.9471
85	8	12	363.05	38.3013
86	9	12	226.98	23.9461
87	10	12	415.476	43.8321
88	11	12	165.13	17.421
89	1	13	1520.53	160.414
90	2	13	2290.22	241.615
91	3	13	2419.22	255.225
92	4	13	1452.2	153.205
93	5	13	7313.82	771.598
94	6	13	397.608	41.9471
95	7	13	572.555	60.4038
96	1	14	226.98	23.9461
97	2	14	346.361	36.5406
98	3	14	397.608	41.9471
99	4	14	165.13	17.421
100	5	14	330.064	34.8212
101	6	14	268.803	28.3583
102	7	14	1134.11	119.648
103	8	14	188.692	19.9067
104	9	14	188.692	19.9067
105	10	14	683.493	72.1075
106	1	15	593.957	62.6617
107	2	15	1017.88	107.384
108	3	15	314.159	33.1434
109	1	16	572.555	60.4038
110	2	16	6432.61	678.631
111	3	16	1194.59	126.028
112	4	16	637.94	67.3017
113	5	16	510.705	53.8787
114	6	16	346.361	36.5406
115	1	17	330.064	34.8212
116	2	17	213.825	22.5582
117	3	17	433.736	45.7585
118	4	17	346.361	36.5406
119	1	18	551.546	58.1873
120	1	20	804.248	84.847
121	2	20	855.299	90.2328
122	3	20	1418.63	149.663
123	4	20	907.92	95.7843
124	5	20	1225.42	129.28
125	6	20	510.705	53.8787
126	7	20	706.858	74.5726
127	8	20	471.435	49.7358
128	1	21	415.476	43.8321
129	2	21	380.133	40.1035
130	1	22	153.938	16.2402
131	2	22	240.528	25.3754
132	3	22	143.139	15.1009
133	4	22	226.98	23.9461
134	5	22	143.139	15.1009
135	6	22	226.98	23.9461
136	7	22	56.745	5.98652
137	1	23	6082.12	641.655
138	1	24	240.528	25.3754
139	2	24	330.064	34.8212
140	3	24	254.469	26.8461
141	4	24	346.361	36.5406
142	5	24	132.732	14.0031
143	6	24	363.05	38.3013
144	7	24	330.064	34.8212
145	8	24	298.648	31.5069
146	9	24	314.159	33.1434
147	10	24	330.064	34.8212
148	11	24	330.064	34.8212
149	12	24	452.389	47.7264
150	13	24	433.736	45.7585
151	14	24	415.476	43.8321
152	15	24	1320.25	139.285
153	16	24	165.13	17.421
154	17	24	226.98	23.9461
155	1	25	113.097	11.9316
156	2	25	213.825	22.5582
157	3	25	176.715	18.6431
158	4	25	176.715	18.6431
159	5	25	188.692	19.9067
160	6	25	165.13	17.421
161	7	25	176.715	18.6431
162	8	25	188.692	19.9067
163	9	25	176.715	18.6431
164	10	25	113.097	11.9316
165	11	25	165.13	17.421
166	12	25	201.062	21.2117
167	13	25	165.13	17.421
168	14	25	226.98	23.9461
169	15	25	188.692	19.9067
170	16	25	165.13	17.421
171	17	25	153.938	16.2402
172	1	26	132.732	14.0031
173	2	26	213.825	22.5582
174	3	26	143.139	15.1009
175	1	27	1661.9	175.328
176	2	27	2733.97	288.43
177	3	27	2970.57	313.391
178	4	27	1555.28	164.08
179	5	27	2419.22	255.225
180	1	29	4359.16	459.885
181	2	29	2290.22	241.615
182	3	29	8171.28	862.059
183	1	30	213.825	22.5582
184	2	30	122.718	12.9466
185	3	30	132.732	14.0031
186	4	30	240.528	25.3754
187	5	30	122.718	12.9466
188	6	30	95.0332	10.0259
189	7	30	70.8822	7.47797
190	8	30	143.139	15.1009
191	9	30	70.8822	7.47797
192	10	30	78.5398	8.28584
193	1	32	254.469	26.8461
194	2	32	226.98	23.9461
195	3	32	226.98	23.9461
196	4	32	213.825	22.5582
197	5	32	254.469	26.8461
198	6	32	122.718	12.9466
199	7	32	240.528	25.3754
200	8	32	363.05	38.3013
201	9	32	433.736	45.7585
202	10	32	176.715	18.6431
203	11	32	201.062	21.2117
204	12	32	240.528	25.3754
205	13	32	254.469	26.8461
206	14	32	213.825	22.5582
207	15	32	165.13	17.421
208	16	32	188.692	19.9067
209	17	32	283.529	29.9119
210	1	33	1486.17	156.789
211	2	33	855.299	90.2328
212	3	33	1320.25	139.285
213	4	33	1555.28	164.08
214	5	33	1256.64	132.573
215	6	33	1698.23	179.161
216	7	33	188.692	19.9067
217	8	33	779.311	82.2162
218	9	33	881.413	92.9878
219	10	33	1017.88	107.384
220	1	34	122.718	12.9466
221	2	34	153.938	16.2402
222	3	34	153.938	16.2402
223	4	34	188.692	19.9067
224	5	34	188.692	19.9067
225	6	34	122.718	12.9466
226	7	34	113.097	11.9316
227	1	35	1075.21	113.433
228	2	35	829.577	87.5192
229	3	35	962.113	101.502
230	4	35	962.113	101.502
231	5	35	804.248	84.847
232	1	37	5026.55	530.294
233	2	37	2596.72	273.951
234	3	37	9589.91	1011.72
235	1	38	1164.16	122.817
236	1	39	240.528	25.3754
237	2	39	283.529	29.9119
238	3	39	471.435	49.7358
239	4	39	254.469	26.8461
240	5	39	226.98	23.9461
241	6	39	213.825	22.5582
242	7	39	380.133	40.1035
243	8	39	188.692	19.9067
244	9	39	226.98	23.9461
245	10	39	132.732	14.0031
246	11	39	254.469	26.8461
247	12	39	188.692	19.9067
248	13	39	298.648	31.5069
249	14	39	283.529	29.9119
250	1	40	226.98	23.9461
251	1	41	660.52	69.6839
252	2	41	165.13	17.421
253	3	41	86.5901	9.13514
254	4	41	103.869	10.958
255	5	41	165.13	17.421
256	6	41	132.732	14.0031
257	7	41	95.0332	10.0259
258	8	41	143.139	15.1009
259	1	42	268.803	28.3583
260	2	42	254.469	26.8461
261	3	42	380.133	40.1035
262	4	42	397.608	41.9471
263	5	42	380.133	40.1035
264	6	42	433.736	45.7585
265	7	42	380.133	40.1035
266	8	42	314.159	33.1434
267	9	42	298.648	31.5069
268	10	42	314.159	33.1434
269	11	42	471.435	49.7358
270	12	42	254.469	26.8461
271	13	42	433.736	45.7585
272	14	42	1352.65	142.703
273	15	42	176.715	18.6431
274	1	44	433.736	45.7585
275	2	44	572.555	60.4038
276	3	44	397.608	41.9471
277	4	44	415.476	43.8321
278	5	44	433.736	45.7585
279	6	44	283.529	29.9119
280	7	44	471.435	49.7358
281	8	44	397.608	41.9471
282	9	44	415.476	43.8321
283	10	44	165.13	17.421
284	11	44	298.648	31.5069
285	1	45	551.546	58.1873
286	2	45	907.92	95.7843
287	3	45	283.529	29.9119
288	4	45	165.13	17.421
289	1	47	4242.92	447.622
290	2	47	4963.91	523.686
291	3	47	4839.82	510.594
292	4	47	1452.2	153.205
293	5	47	25305.7	2669.72
294	6	47	254.469	26.8461
295	7	47	6361.73	671.153
296	1	48	63.6173	6.71153
297	2	48	70.8822	7.47797
298	3	48	122.718	12.9466
299	4	48	95.0332	10.0259
300	1	49	1625.97	171.538
301	2	49	1452.2	153.205
302	3	49	1352.65	142.703
303	4	49	1698.23	179.161
304	5	49	1661.9	175.328
305	6	49	881.413	92.9878
306	7	49	754.768	79.6269
307	1	50	433.736	45.7585
308	2	50	283.529	29.9119
309	3	50	660.52	69.6839
310	4	50	615.752	64.961
311	5	50	683.493	72.1075
312	6	50	471.435	49.7358
313	7	50	2164.75	228.378
314	1	51	1194.59	126.028
315	2	51	989.798	104.422
316	3	51	989.798	104.422
317	4	51	881.413	92.9878
318	5	51	881.413	92.9878
319	6	51	551.546	58.1873
320	7	51	176.715	18.6431
321	1	52	213.825	22.5582
322	2	52	153.938	16.2402
323	3	52	176.715	18.6431
324	4	52	934.82	98.6222
325	5	52	113.097	11.9316
326	6	52	143.139	15.1009
327	7	52	176.715	18.6431
328	8	52	153.938	16.2402
329	1	56	188.692	19.9067
330	2	56	188.692	19.9067
331	3	56	201.062	21.2117
332	4	56	330.064	34.8212
333	1	57	1625.97	171.538
334	2	57	213.825	22.5582
335	3	57	95.0332	10.0259
336	4	57	113.097	11.9316
337	5	57	122.718	12.9466
338	6	57	86.5901	9.13514
339	7	57	298.648	31.5069
340	8	57	132.732	14.0031
341	1	58	397.608	41.9471
342	2	58	754.768	79.6269
343	1	60	3793.67	400.227
344	2	60	5808.8	612.821
345	1	61	1772.05	186.949
346	2	61	1194.59	126.028
347	3	61	2083.07	219.761
348	4	61	1164.16	122.817
349	5	61	1385.44	146.162
350	6	61	1385.44	146.162
351	7	61	730.617	77.079
352	8	61	1288.25	135.908
353	1	63	1847.45	194.904
354	2	63	1418.63	149.663
355	1	65	95.0332	10.0259
356	1	67	132.732	14.0031
357	2	67	153.938	16.2402
358	3	67	176.715	18.6431
359	4	67	143.139	15.1009
360	5	67	132.732	14.0031
361	6	67	95.0332	10.0259
362	7	67	103.869	10.958
363	8	67	201.062	21.2117
364	9	67	63.6173	6.71153
365	10	67	855.299	90.2328
366	11	67	56.745	5.98652
367	1	68	283.529	29.9119
368	2	68	471.435	49.7358
369	3	68	283.529	29.9119
370	1	69	471.435	49.7358
371	2	69	551.546	58.1873
372	3	69	298.648	31.5069
373	4	69	452.389	47.7264
374	5	69	346.361	36.5406
375	6	69	363.05	38.3013
376	7	69	298.648	31.5069
377	8	69	1164.16	122.817
378	9	69	510.705	53.8787
379	10	69	143.139	15.1009
380	11	69	143.139	15.1009
381	12	69	363.05	38.3013
382	13	69	268.803	28.3583
383	14	69	415.476	43.8321
384	15	69	1046.35	110.388
385	16	69	363.05	38.3013
386	1	70	1046.35	110.388
387	2	70	881.413	92.9878
388	3	70	855.299	90.2328
389	4	70	730.617	77.079
390	5	70	510.705	53.8787
391	6	70	153.938	16.2402
392	7	70	113.097	11.9316
393	8	70	779.311	82.2162
394	9	70	471.435	49.7358
395	10	70	1486.17	156.789
396	11	70	593.957	62.6617
397	1	71	78.5398	8.28584
398	2	71	143.139	15.1009
399	3	71	78.5398	8.28584
400	1	72	1698.23	179.161
401	2	72	706.858	74.5726
402	3	72	1452.2	153.205
403	4	72	1225.42	129.28
404	5	72	2042.82	215.515
405	6	72	1288.25	135.908
406	7	72	1104.47	116.52
407	8	72	881.413	92.9878
408	9	72	1134.11	119.648
409	1	73	962.113	101.502
410	2	73	1288.25	135.908
411	3	73	1017.88	107.384
412	4	73	855.299	90.2328
413	5	73	415.476	43.8321
414	6	73	2164.75	228.378
415	7	73	660.52	69.6839
416	8	73	1225.42	129.28
417	9	73	934.82	98.6222
418	1	74	1772.05	186.949
419	2	74	254.469	26.8461
420	3	74	103.869	10.958
421	4	74	314.159	33.1434
422	5	74	113.097	11.9316
423	6	74	95.0332	10.0259
424	7	74	95.0332	10.0259
425	8	74	86.5901	9.13514
426	9	74	113.097	11.9316
427	10	74	113.097	11.9316
428	11	74	113.097	11.9316
429	1	75	683.493	72.1075
430	2	75	706.858	74.5726
431	3	75	804.248	84.847
432	4	75	754.768	79.6269
433	5	75	637.94	67.3017
434	6	75	683.493	72.1075
435	7	75	572.555	60.4038
436	8	75	3318.31	350.077
437	9	75	660.52	69.6839
438	10	75	2596.72	273.951
439	1	76	989.798	104.422
440	2	76	829.577	87.5192
441	3	76	683.493	72.1075
442	4	76	490.874	51.7865
443	5	76	1320.25	139.285
444	6	76	298.648	31.5069
445	7	76	176.715	18.6431
446	8	76	226.98	23.9461
447	9	76	615.752	64.961
448	1	77	1625.97	171.538
449	2	77	2733.97	288.43
450	3	77	2419.22	255.225
451	4	77	380.133	40.1035
452	5	77	176.715	18.6431
453	6	77	433.736	45.7585
454	7	77	5674.5	598.652
455	1	78	346.361	36.5406
456	2	78	433.736	45.7585
457	3	78	346.361	36.5406
458	4	78	298.648	31.5069
459	5	78	254.469	26.8461
460	6	78	283.529	29.9119
461	7	78	254.469	26.8461
462	8	78	240.528	25.3754
463	9	78	346.361	36.5406
464	10	78	346.361	36.5406
465	11	78	188.692	19.9067
466	12	78	254.469	26.8461
467	13	78	213.825	22.5582
468	14	78	70.8822	7.47797
469	15	78	201.062	21.2117
470	16	78	240.528	25.3754
471	17	78	268.803	28.3583
472	18	78	330.064	34.8212
473	19	78	298.648	31.5069
474	20	78	254.469	26.8461
475	21	78	452.389	47.7264
476	22	78	143.139	15.1009
477	1	81	113.097	11.9316
478	2	81	86.5901	9.13514
479	3	81	346.361	36.5406
480	1	82	1772.05	186.949
481	2	82	1555.28	164.08
482	3	82	1164.16	122.817
483	4	82	298.648	31.5069
484	1	83	56.745	5.98652
485	2	83	56.745	5.98652
486	3	83	78.5398	8.28584
487	4	83	44.1786	4.66078
488	5	83	38.4845	4.06006
489	1	84	4242.92	447.622
490	2	84	5026.55	530.294
491	3	84	3848.45	406.006
492	1	85	17671.5	1864.31
493	2	85	2463.01	259.844
494	1	88	804.248	84.847
495	2	88	3318.31	350.077
496	3	88	1194.59	126.028
497	4	88	962.113	101.502
498	5	88	1194.59	126.028
499	6	88	3421.19	360.931
500	7	88	1352.65	142.703
501	8	88	572.555	60.4038
502	9	88	530.929	56.0123
503	10	88	1075.21	113.433
504	1	89	1320.25	139.285
505	2	89	615.752	64.961
506	3	89	962.113	101.502
507	4	89	1288.25	135.908
508	5	89	510.705	53.8787
509	6	89	907.92	95.7843
510	7	89	829.577	87.5192
511	1	91	1924.42	203.024
512	2	91	1847.45	194.904
513	3	91	1320.25	139.285
514	4	91	1885.74	198.943
515	5	91	1809.56	190.906
516	6	91	1452.2	153.205
517	7	91	14633.7	1543.84
518	1	92	3739.28	394.489
519	2	92	397.608	41.9471
520	3	92	70.8822	7.47797
521	4	92	804.248	84.847
522	5	92	70.8822	7.47797
523	6	92	95.0332	10.0259
524	7	92	283.529	29.9119
525	8	92	415.476	43.8321
526	1	94	5876.55	619.967
527	2	94	8992.02	948.646
528	3	94	17319.8	1827.21
529	1	96	10843.4	1143.96
530	2	96	572.555	60.4038
531	1	97	86.5901	9.13514
532	2	97	78.5398	8.28584
533	1	98	397.608	41.9471
534	2	98	593.957	62.6617
535	3	98	346.361	36.5406
536	4	98	226.98	23.9461
537	5	98	572.555	60.4038
538	6	98	330.064	34.8212
539	7	98	143.139	15.1009
540	8	98	433.736	45.7585
541	1	100	1772.05	186.949
542	2	100	2164.75	228.378
543	3	100	1194.59	126.028
544	4	100	2206.18	232.749
545	5	100	1963.5	207.146
546	6	100	1924.42	203.024
547	7	100	2042.82	215.515
548	8	100	730.617	77.079
549	9	100	1017.88	107.384
550	10	100	10568.3	1114.94
551	11	100	1418.63	149.663
552	1	101	1772.05	186.949
553	2	101	2164.75	228.378
554	3	101	1194.59	126.028
555	4	101	2206.18	232.749
556	5	101	1963.5	207.146
557	6	101	1924.42	203.024
558	7	101	2042.82	215.515
559	8	101	730.617	77.079
560	9	101	1017.88	107.384
561	10	101	10568.3	1114.94
562	11	101	1418.63	149.663
563	1	102	1555.28	164.08
564	2	102	2596.72	273.951
565	3	102	380.133	40.1035
566	4	102	415.476	43.8321
567	5	102	165.13	17.421
568	6	102	2332.83	246.11
569	7	102	330.064	34.8212
570	8	102	5410.61	570.811
571	1	103	1256.64	132.573
572	2	103	829.577	87.5192
573	3	103	934.82	98.6222
574	4	103	2002.96	211.31
575	5	103	452.389	47.7264
576	6	103	706.858	74.5726
577	7	103	779.311	82.2162
578	8	103	615.752	64.961
579	9	103	754.768	79.6269
580	1	104	5345.62	563.955
581	2	104	4476.97	472.314
582	3	104	4071.5	429.538
583	1	106	4717.3	497.668
584	2	106	3739.28	394.489
585	3	106	6361.73	671.153
586	1	107	452.389	47.7264
587	2	107	1486.17	156.789
588	3	107	1134.11	119.648
589	4	107	804.248	84.847
590	5	107	2874.75	303.282
591	6	107	433.736	45.7585
592	7	107	779.311	82.2162
593	1	108	5345.62	563.955
594	2	108	8091.37	853.628
595	1	109	363.05	38.3013
596	2	109	298.648	31.5069
597	3	109	213.825	22.5582
598	4	109	213.825	22.5582
599	5	109	330.064	34.8212
600	6	109	397.608	41.9471
601	7	109	213.825	22.5582
602	8	109	346.361	36.5406
603	9	109	213.825	22.5582
604	10	109	268.803	28.3583
605	11	109	314.159	33.1434
606	12	109	268.803	28.3583
607	13	109	254.469	26.8461
608	14	109	397.608	41.9471
609	15	109	201.062	21.2117
610	16	109	397.608	41.9471
611	17	109	240.528	25.3754
612	18	109	268.803	28.3583
613	19	109	268.803	28.3583
614	20	109	213.825	22.5582
615	21	109	226.98	23.9461
616	22	109	201.062	21.2117
617	1	110	17671.5	1864.31
618	2	110	2507.19	264.505
619	1	111	8332.29	879.045
620	1	113	50.2655	5.30294
621	2	113	63.6173	6.71153
622	3	113	86.5901	9.13514
623	4	113	38.4845	4.06006
624	5	113	33.1831	3.50077
625	1	114	38.4845	4.06006
626	1	115	122.718	12.9466
627	2	115	213.825	22.5582
628	3	115	113.097	11.9316
629	1	116	754.768	79.6269
630	2	116	881.413	92.9878
631	3	116	471.435	49.7358
632	4	116	1194.59	126.028
633	5	116	637.94	67.3017
634	6	116	254.469	26.8461
635	7	116	176.715	18.6431
636	8	116	1194.59	126.028
637	9	116	201.062	21.2117
638	1	118	165.13	17.421
639	2	118	70.8822	7.47797
640	3	118	213.825	22.5582
641	4	118	213.825	22.5582
642	5	118	165.13	17.421
643	6	118	188.692	19.9067
644	7	118	103.869	10.958
645	8	118	103.869	10.958
646	9	118	240.528	25.3754
647	10	118	706.858	74.5726
648	11	118	283.529	29.9119
649	12	118	201.062	21.2117
650	13	118	132.732	14.0031
651	14	118	70.8822	7.47797
652	15	118	346.361	36.5406
653	16	118	70.8822	7.47797
654	17	118	176.715	18.6431
655	1	119	989.798	104.422
656	2	119	510.705	53.8787
657	3	119	153.938	16.2402
658	4	119	615.752	64.961
659	5	119	433.736	45.7585
660	6	119	153.938	16.2402
661	7	119	637.94	67.3017
662	8	119	240.528	25.3754
663	9	119	415.476	43.8321
664	1	121	471.435	49.7358
665	2	121	530.929	56.0123
666	3	121	452.389	47.7264
667	4	121	415.476	43.8321
668	5	121	254.469	26.8461
669	6	121	240.528	25.3754
670	1	122	1698.23	179.161
671	2	122	2083.07	219.761
672	3	122	1520.53	160.414
673	4	122	1809.56	190.906
674	5	122	2123.72	224.049
675	6	122	1847.45	194.904
676	7	122	1963.5	207.146
677	8	122	730.617	77.079
678	9	122	10207	1076.83
679	1	124	4071.5	429.538
680	2	124	3631.68	383.137
681	3	124	4901.67	517.119
682	1	126	2164.75	228.378
683	2	126	298.648	31.5069
684	3	126	226.98	23.9461
685	4	126	50.2655	5.30294
686	5	126	44.1786	4.66078
687	6	126	153.938	16.2402
688	7	126	38.4845	4.06006
689	8	126	56.745	5.98652
690	9	126	143.139	15.1009
691	10	126	989.798	104.422
692	11	126	113.097	11.9316
693	1	128	70.8822	7.47797
694	2	128	95.0332	10.0259
695	3	128	95.0332	10.0259
696	4	128	78.5398	8.28584
697	5	128	78.5398	8.28584
698	1	129	44.1786	4.66078
699	2	129	44.1786	4.66078
700	1	130	1486.17	156.789
701	2	130	452.389	47.7264
702	3	130	1104.47	116.52
703	4	130	660.52	69.6839
704	5	130	2780.51	293.339
705	6	130	804.248	84.847
706	7	130	433.736	45.7585
707	1	131	103.869	10.958
708	2	131	153.938	16.2402
709	3	131	176.715	18.6431
710	4	131	132.732	14.0031
711	5	131	132.732	14.0031
712	1	132	3903.63	411.827
713	2	132	3019.07	318.508
714	3	132	1046.35	110.388
715	4	132	1734.94	183.034
716	5	132	314.159	33.1434
717	1	133	44.1786	4.66078
718	2	133	165.13	17.421
719	3	133	176.715	18.6431
720	4	133	56.745	5.98652
721	5	133	330.064	34.8212
722	1	134	4015.15	423.593
723	2	134	4015.15	423.593
724	3	134	1256.64	132.573
725	4	134	2123.72	224.049
726	5	134	1885.74	198.943
727	6	134	86.5901	9.13514
728	1	135	14102.6	1487.81
729	1	138	2123.72	224.049
730	1	139	346.361	36.5406
731	2	139	201.062	21.2117
732	3	139	201.062	21.2117
733	4	139	254.469	26.8461
734	5	139	989.798	104.422
735	1	140	1809.56	190.906
736	2	140	1520.53	160.414
737	3	140	1486.17	156.789
738	4	140	1809.56	190.906
739	5	140	1772.05	186.949
740	6	140	934.82	98.6222
741	1	141	153.938	16.2402
742	2	141	122.718	12.9466
743	3	141	143.139	15.1009
744	4	141	153.938	16.2402
745	5	141	56.745	5.98652
746	6	141	86.5901	9.13514
747	7	141	165.13	17.421
748	8	141	113.097	11.9316
749	9	141	153.938	16.2402
750	1	142	1698.23	179.161
751	2	142	213.825	22.5582
752	3	142	122.718	12.9466
753	4	142	103.869	10.958
754	5	142	78.5398	8.28584
755	6	142	132.732	14.0031
756	1	143	86.5901	9.13514
757	2	143	226.98	23.9461
758	3	143	122.718	12.9466
759	4	143	122.718	12.9466
760	5	143	103.869	10.958
761	6	143	143.139	15.1009
762	7	143	268.803	28.3583
763	8	143	56.745	5.98652
764	9	143	56.745	5.98652
765	1	144	989.798	104.422
766	2	144	989.798	104.422
767	3	144	1256.64	132.573
768	4	144	1075.21	113.433
769	5	144	7932.72	836.891
770	6	144	1075.21	113.433
771	7	144	397.608	41.9471
772	8	144	660.52	69.6839
773	1	146	510.705	53.8787
774	2	146	165.13	17.421
775	3	146	268.803	28.3583
776	4	146	934.82	98.6222
777	1	147	201.062	21.2117
778	2	147	113.097	11.9316
779	3	147	188.692	19.9067
780	4	147	153.938	16.2402
781	5	147	165.13	17.421
782	6	147	176.715	18.6431
783	7	147	188.692	19.9067
784	8	147	176.715	18.6431
785	9	147	188.692	19.9067
786	10	147	188.692	19.9067
787	11	147	226.98	23.9461
788	12	147	268.803	28.3583
789	13	147	240.528	25.3754
790	14	147	176.715	18.6431
791	15	147	176.715	18.6431
792	16	147	165.13	17.421
793	17	147	176.715	18.6431
794	1	148	2248.01	237.161
795	2	148	1809.56	190.906
796	3	148	1486.17	156.789
797	4	148	3739.28	394.489
798	5	148	8824.73	930.997
799	6	148	4778.36	504.11
800	7	148	2733.97	288.43
801	1	149	176.715	18.6431
802	2	149	113.097	11.9316
803	3	149	188.692	19.9067
804	4	149	165.13	17.421
805	5	149	176.715	18.6431
806	6	149	240.528	25.3754
807	7	149	78.5398	8.28584
808	8	149	176.715	18.6431
809	1	151	7238.23	763.623
810	2	151	2248.01	237.161
811	1	152	39760.8	4194.71
812	2	152	1809.56	190.906
813	3	152	1698.23	179.161
814	4	152	3216.99	339.388
815	5	152	1385.44	146.162
816	6	152	2332.83	246.11
817	7	152	2290.22	241.615
818	8	152	2551.76	269.207
819	1	153	4015.15	423.593
820	2	153	2970.57	313.391
821	3	153	1017.88	107.384
822	4	153	1772.05	186.949
823	1	154	4128.25	435.524
824	2	154	4128.25	435.524
825	3	154	1288.25	135.908
826	4	154	2083.07	219.761
827	5	154	1885.74	198.943
828	6	154	86.5901	9.13514
829	1	156	1017.88	107.384
830	2	156	779.311	82.2162
831	3	156	962.113	101.502
832	4	156	989.798	104.422
833	5	156	1075.21	113.433
834	1	158	5281.02	557.14
835	2	158	5345.62	563.955
836	1	159	2042.82	215.515
837	2	159	2290.22	241.615
838	3	159	1075.21	113.433
839	4	159	593.957	62.6617
840	5	159	1590.43	167.788
841	6	159	1486.17	156.789
842	1	160	1385.44	146.162
843	2	160	213.825	22.5582
844	3	160	490.874	51.7865
845	4	160	754.768	79.6269
846	5	160	660.52	69.6839
847	6	160	637.94	67.3017
848	7	160	615.752	64.961
849	1	161	1320.25	139.285
850	2	161	2874.75	303.282
851	3	161	1924.42	203.024
852	4	161	2642.08	278.736
853	1	162	1772.05	186.949
854	2	162	1486.17	156.789
855	3	162	1452.2	153.205
856	4	162	1809.56	190.906
857	5	162	962.113	101.502
858	6	162	1734.94	183.034
859	7	162	683.493	72.1075
860	1	163	2248.01	237.161
861	2	163	1104.47	116.52
862	3	163	4901.67	517.119
863	4	163	471.435	49.7358
864	5	163	2780.51	293.339
865	6	163	907.92	95.7843
866	1	164	240.528	25.3754
867	2	164	254.469	26.8461
868	3	164	132.732	14.0031
869	4	164	330.064	34.8212
870	5	164	268.803	28.3583
871	6	164	226.98	23.9461
872	7	164	240.528	25.3754
873	8	164	471.435	49.7358
874	9	164	176.715	18.6431
875	10	164	188.692	19.9067
876	1	167	86.5901	9.13514
877	2	167	201.062	21.2117
878	3	167	86.5901	9.13514
879	1	168	176.715	18.6431
880	2	168	226.98	23.9461
881	3	168	176.715	18.6431
882	4	168	113.097	11.9316
883	5	168	188.692	19.9067
884	6	168	176.715	18.6431
885	7	168	201.062	21.2117
886	8	168	113.097	11.9316
887	9	168	213.825	22.5582
888	10	168	165.13	17.421
889	11	168	165.13	17.421
890	12	168	188.692	19.9067
891	13	168	268.803	28.3583
892	14	168	240.528	25.3754
893	15	168	176.715	18.6431
894	1	169	3685.28	388.792
895	2	169	3793.67	400.227
896	3	169	3166.92	334.106
897	1	172	2206.18	232.749
898	2	172	2687.83	283.562
899	3	172	15614.5	1647.31
900	4	172	1661.9	175.328
901	5	172	7542.96	795.772
902	6	172	2419.22	255.225
903	7	172	1385.44	146.162
904	1	173	5475.99	577.709
905	2	173	5281.02	557.14
906	1	174	8011.85	845.238
907	2	174	363.05	38.3013
908	3	174	1352.65	142.703
909	4	174	283.529	29.9119
910	5	174	226.98	23.9461
911	1	175	2123.72	224.049
912	2	175	637.94	67.3017
913	3	175	1661.9	175.328
914	4	175	1104.47	116.52
915	5	175	2463.01	259.844
916	1	176	1418.63	149.663
917	2	176	2970.57	313.391
918	3	176	2780.51	293.339
919	4	176	1486.17	156.789
920	1	177	452.389	47.7264
921	2	177	314.159	33.1434
922	3	177	254.469	26.8461
923	4	177	213.825	22.5582
924	5	177	314.159	33.1434
925	6	177	452.389	47.7264
926	7	177	433.736	45.7585
927	8	177	298.648	31.5069
928	9	177	86.5901	9.13514
929	10	177	113.097	11.9316
930	11	177	1075.21	113.433
931	1	178	1452.2	153.205
932	2	178	213.825	22.5582
933	3	178	706.858	74.5726
934	4	178	530.929	56.0123
935	5	178	706.858	74.5726
936	1	179	754.768	79.6269
937	2	179	551.546	58.1873
938	3	179	615.752	64.961
939	4	179	363.05	38.3013
940	1	180	240.528	25.3754
941	2	180	452.389	47.7264
942	3	180	132.732	14.0031
943	4	180	226.98	23.9461
944	5	180	268.803	28.3583
945	6	180	268.803	28.3583
946	7	180	226.98	23.9461
947	8	180	176.715	18.6431
948	9	180	254.469	26.8461
949	10	180	165.13	17.421
950	11	180	86.5901	9.13514
951	12	180	78.5398	8.28584
952	13	180	86.5901	9.13514
953	1	181	3369.55	355.483
954	2	181	4656.63	491.267
955	3	181	4128.25	435.524
956	4	181	12868	1357.55
957	1	182	1772.05	186.949
958	2	182	3318.31	350.077
959	3	182	1520.53	160.414
960	4	182	1256.64	132.573
961	5	182	1963.5	207.146
962	1	183	2874.75	303.282
963	2	183	3318.31	350.077
964	3	183	20485	2161.13
965	4	183	2123.72	224.049
966	5	183	3117.25	328.865
967	6	183	9852.03	1039.38
968	1	184	36474.1	3847.96
969	2	184	2248.01	237.161
970	1	185	56.745	5.98652
971	2	185	143.139	15.1009
972	1	187	989.798	104.422
973	2	187	471.435	49.7358
974	3	187	268.803	28.3583
975	4	187	855.299	90.2328
976	5	187	346.361	36.5406
977	6	187	510.705	53.8787
978	7	187	363.05	38.3013
979	8	187	397.608	41.9471
980	9	187	363.05	38.3013
981	10	187	397.608	41.9471
982	11	187	314.159	33.1434
983	12	187	397.608	41.9471
984	13	187	188.692	19.9067
985	14	187	415.476	43.8321
986	1	188	1661.9	175.328
987	2	188	2248.01	237.161
988	3	188	2083.07	219.761
989	4	188	2463.01	259.844
990	1	189	363.05	38.3013
991	2	189	415.476	43.8321
992	3	189	380.133	40.1035
993	1	190	7932.72	836.891
994	2	190	346.361	36.5406
995	3	190	240.528	25.3754
996	4	190	226.98	23.9461
997	5	190	1288.25	135.908
998	6	190	201.062	21.2117
999	1	192	122.718	12.9466
1000	2	192	153.938	16.2402
1001	3	192	132.732	14.0031
1002	4	192	56.745	5.98652
1003	5	192	103.869	10.958
1004	6	192	63.6173	6.71153
1005	7	192	78.5398	8.28584
1006	8	192	103.869	10.958
1007	1	194	86.5901	9.13514
1008	1	195	1885.74	198.943
1009	2	195	2507.19	264.505
1010	3	195	2687.83	283.562
1011	4	195	2290.22	241.615
1012	1	196	706.858	74.5726
1013	2	196	452.389	47.7264
1014	3	196	314.159	33.1434
1015	4	196	330.064	34.8212
1016	5	196	254.469	26.8461
1017	6	196	240.528	25.3754
1018	7	196	330.064	34.8212
1019	8	196	153.938	16.2402
1020	9	196	551.546	58.1873
1021	10	196	176.715	18.6431
1022	11	196	143.139	15.1009
1023	1	198	86.5901	9.13514
1024	1	200	683.493	72.1075
1025	2	200	240.528	25.3754
1026	3	200	346.361	36.5406
1027	4	200	314.159	33.1434
1028	5	200	433.736	45.7585
1029	6	200	254.469	26.8461
1030	7	200	330.064	34.8212
1031	8	200	165.13	17.421
1032	9	200	593.957	62.6617
1033	10	200	143.139	15.1009
1034	11	200	153.938	16.2402
1035	12	200	132.732	14.0031
1036	13	200	1017.88	107.384
1037	14	200	176.715	18.6431
