# Supplementary material for: Apple estimation and recognition in complex scenes using YOLO v8
Source: PeerJ journal article supplement (doi:10.7717/peerj-cs.3116), 2025-10-16
Supplement: Appendix_4_staffEH.xlsx [file Appendix_4_staffEH.xlsx]

## Sheet: Apple
Apple sample RGB color channel frequency
Pixel Value	Red Channel Frequency	Green Channel Frequency	Blue Channel Frequency
0	3343	1809	1012
1	373	372	126
2	362	434	129
3	396	432	128
4	395	489	141
5	387	504	144
6	408	468	153
7	445	560	156
8	413	444	156
9	364	430	160
10	410	440	176
11	387	432	178
12	327	404	190
13	323	482	153
14	332	404	194
15	327	383	209
16	289	346	172
17	277	263	150
18	290	238	163
19	238	271	156
20	249	273	146
21	215	242	122
22	263	192	137
23	241	179	186
24	196	197	161
25	183	149	121
26	191	177	142
27	207	183	137
28	165	166	174
29	186	169	139
30	211	171	152
31	175	159	127
32	227	201	221
33	306	326	230
34	228	220	201
35	645	571	542
36	254	246	241
37	268	298	284
38	2466	2496	2429
39	225	270	203
40	241	272	179
41	259	220	207
42	214	193	202
43	204	196	172
44	184	180	175
45	193	189	164
46	142	150	134
47	184	153	135
48	163	145	154
49	166	145	147
50	164	132	128
51	168	134	137
52	149	123	118
53	228	130	129
54	121	100	111
55	120	102	94
56	127	126	133
57	140	104	181
58	137	104	127
59	122	115	95
60	116	85	92
61	147	93	91
62	106	100	92
63	117	102	119
64	129	104	102
65	124	94	107
66	118	97	98
67	117	116	112
68	125	103	99
69	130	118	112
70	154	139	134
71	108	106	101
72	109	110	88
73	108	101	95
74	126	99	107
75	114	102	113
76	124	95	99
77	132	115	118
78	102	71	92
79	107	91	94
80	97	78	88
81	94	86	103
82	129	108	121
83	86	69	85
84	80	74	82
85	94	85	103
86	101	93	97
87	101	91	107
88	94	87	87
89	109	79	88
90	104	80	86
91	83	77	78
92	85	68	79
93	86	78	80
94	93	93	93
95	89	71	82
96	78	73	57
97	77	77	74
98	90	78	98
99	83	66	78
100	88	85	84
101	85	68	89
102	76	62	74
103	81	81	78
104	65	64	77
105	81	68	78
106	65	77	74
107	59	48	57
108	61	68	83
109	78	73	79
110	87	80	88
111	53	41	59
112	50	56	72
113	55	55	61
114	49	43	52
115	54	53	65
116	61	63	72
117	57	47	69
118	60	53	75
119	46	45	75
120	45	43	65
121	55	45	62
122	64	42	62
123	47	40	59
124	50	53	57
125	51	49	70
126	40	55	58
127	49	57	74
128	55	53	78
129	49	41	67
130	44	33	64
131	56	45	72
132	51	41	79
133	58	55	88
134	39	59	74
135	40	49	65
136	43	46	69
137	72	62	93
138	48	52	77
139	61	60	92
140	44	50	97
141	59	61	90
142	70	60	90
143	54	56	90
144	55	44	88
145	70	68	115
146	61	45	135
147	64	62	98
148	84	70	142
149	68	61	87
150	52	57	117
151	76	78	109
152	89	80	121
153	79	71	118
154	76	70	121
155	87	73	134
156	96	88	119
157	99	77	151
158	80	83	128
159	108	80	110
160	70	73	99
161	122	97	138
162	106	70	116
163	98	90	139
164	89	76	143
165	107	80	177
166	98	93	149
167	100	96	152
168	79	81	113
169	97	82	134
170	111	96	138
171	95	73	128
172	93	96	131
173	158	88	142
174	83	77	126
175	128	107	161
176	148	103	158
177	112	95	148
178	106	102	156
179	105	102	143
180	106	100	164
181	100	90	136
182	109	91	144
183	112	112	165
184	118	155	174
185	96	102	166
186	87	147	162
187	113	106	186
188	95	83	141
189	108	94	232
190	94	97	199
191	94	92	170
192	97	92	179
193	117	111	202
194	126	110	184
195	113	114	203
196	108	102	226
197	134	97	200
198	92	86	208
199	102	101	217
200	114	116	251
201	156	112	236
202	113	83	248
203	96	91	216
204	110	104	236
205	117	110	180
206	111	108	205
207	190	163	232
208	146	136	196
209	126	137	220
210	134	117	233
211	155	155	219
212	156	179	227
213	138	202	223
214	137	155	253
215	123	150	234
216	125	133	196
217	152	197	225
218	113	153	265
219	120	134	260
220	162	155	199
221	165	132	236
222	135	194	234
223	167	164	217
224	176	143	221
225	209	182	262
226	194	186	258
227	207	181	307
228	213	184	316
229	268	263	298
230	272	244	370
231	283	269	376
232	289	321	456
233	361	332	495
234	398	378	542
235	437	386	533
236	493	466	682
237	526	517	731
238	680	570	802
239	752	640	1036
240	939	790	1057
241	1144	904	1343
242	1276	1022	1412
243	1315	1160	1796
244	1678	1452	1929
245	2111	1760	2006
246	2264	1937	2538
247	2710	2288	2595
248	2984	2743	3287
249	3324	3199	3537
250	3740	3757	4396
251	4623	4685	4450
252	4776	5408	3811
253	7131	8805	7345
254	10606	11116	6884
255	274956	277274	277499

## Sheet: Carambola
Carambola sample RGB color channel frequency
Pixel Value	Red Channel Frequency	Green Channel Frequency	Blue Channel Frequency
0	2437	1481	817
1	278	294	107
2	306	343	107
3	316	358	125
4	354	450	135
5	339	450	118
6	358	444	135
7	387	539	135
8	346	453	130
9	305	404	155
10	386	423	163
11	321	413	169
12	291	373	166
13	322	427	128
14	262	382	153
15	283	384	185
16	259	320	140
17	224	269	127
18	235	254	144
19	227	220	120
20	199	295	133
21	203	230	92
22	252	206	119
23	183	175	160
24	183	182	124
25	160	172	100
26	137	148	113
27	159	198	136
28	151	176	145
29	166	169	121
30	180	161	149
31	140	192	134
32	157	187	171
33	275	365	228
34	165	202	182
35	478	430	387
36	217	237	221
37	290	286	253
38	2445	2488	2427
39	193	258	187
40	230	242	204
41	237	208	187
42	166	199	171
43	198	183	172
44	169	184	169
45	175	159	152
46	146	136	136
47	155	148	121
48	135	130	142
49	147	149	159
50	152	146	126
51	136	113	118
52	121	121	117
53	189	125	120
54	125	113	113
55	104	107	84
56	115	109	117
57	114	109	171
58	99	93	116
59	101	106	96
60	91	80	98
61	116	75	93
62	116	103	90
63	91	95	82
64	101	99	93
65	113	105	116
66	108	100	108
67	120	103	101
68	106	103	95
69	120	114	111
70	131	127	125
71	115	101	90
72	111	100	92
73	97	86	79
74	105	112	93
75	119	115	100
76	103	99	103
77	127	107	96
78	93	89	89
79	102	84	90
80	84	86	86
81	95	80	85
82	106	101	90
83	84	80	77
84	77	79	82
85	93	83	76
86	104	89	74
87	109	82	84
88	80	90	79
89	83	78	80
90	83	87	75
91	85	77	84
92	68	62	72
93	63	68	63
94	95	98	79
95	76	63	70
96	72	58	63
97	75	77	77
98	98	88	83
99	80	71	62
100	74	60	74
101	77	62	77
102	76	76	68
103	75	70	74
104	52	60	58
105	76	68	69
106	59	59	53
107	55	53	53
108	62	60	70
109	61	70	73
110	84	72	83
111	57	41	56
112	51	45	53
113	50	58	61
114	48	48	61
115	55	58	48
116	45	45	51
117	54	56	65
118	52	52	62
119	67	47	63
120	47	42	49
121	45	35	56
122	43	48	54
123	40	45	63
124	57	64	53
125	41	35	56
126	37	49	61
127	52	55	65
128	61	44	71
129	61	42	58
130	33	43	57
131	47	44	61
132	60	51	67
133	46	55	65
134	47	41	61
135	51	53	62
136	43	43	53
137	63	58	74
138	54	47	67
139	60	57	79
140	52	53	100
141	61	48	78
142	71	64	78
143	44	41	85
144	56	54	75
145	78	67	108
146	58	60	120
147	63	58	88
148	82	70	136
149	57	48	84
150	44	43	115
151	70	65	99
152	86	82	126
153	78	69	97
154	69	63	104
155	98	83	112
156	75	90	129
157	94	78	144
158	90	83	111
159	109	66	113
160	69	60	94
161	99	73	110
162	109	73	110
163	95	89	122
164	84	78	119
165	101	76	178
166	104	74	135
167	112	101	137
168	87	81	122
169	88	77	129
170	92	87	137
171	96	75	127
172	97	83	113
173	157	93	150
174	100	78	133
175	118	103	155
176	141	89	153
177	109	101	132
178	108	97	159
179	99	102	131
180	107	89	159
181	97	93	155
182	110	98	148
183	108	110	142
184	133	141	160
185	98	93	145
186	87	153	146
187	111	99	161
188	80	83	134
189	109	101	225
190	97	89	204
191	80	75	163
192	93	95	156
193	94	96	198
194	108	82	187
195	126	112	178
196	96	84	209
197	117	87	156
198	95	86	183
199	117	98	178
200	111	91	228
201	161	88	257
202	109	78	237
203	89	85	207
204	105	99	227
205	137	99	175
206	110	96	179
207	179	143	197
208	126	111	213
209	93	88	208
210	121	95	188
211	154	118	178
212	135	178	204
213	113	168	216
214	120	137	249
215	133	112	201
216	128	94	186
217	147	172	176
218	104	128	250
219	117	111	215
220	163	102	203
221	147	101	193
222	127	149	194
223	138	126	220
224	168	125	197
225	193	147	244
226	146	153	230
227	180	142	278
228	192	162	248
229	219	226	244
230	264	215	327
231	232	221	325
232	276	286	377
233	301	255	453
234	373	315	445
235	389	300	507
236	449	393	644
237	504	436	646
238	649	486	694
239	730	608	983
240	890	717	988
241	1075	851	1205
242	1168	1017	1332
243	1372	1146	1639
244	1604	1372	1798
245	1902	1640	1912
246	2211	1876	2368
247	2660	2214	2421
248	2898	2749	3122
249	3180	3126	3350
250	3564	3610	4116
251	4600	4381	4280
252	4829	5229	3509
253	7149	8346	7131
254	9677	10269	6393
255	281130	282756	284137

## Sheet: Pear
Pear sample RGB color channel frequency
Pixel Value	Red Channel Frequency	Green Channel Frequency	Blue Channel Frequency
0	3414	1879	1326
1	300	324	145
2	306	339	158
3	322	388	156
4	306	390	188
5	295	393	177
6	295	426	179
7	325	512	194
8	334	424	208
9	278	440	178
10	312	445	227
11	259	507	225
12	267	460	226
13	284	561	198
14	249	481	229
15	263	469	248
16	269	410	200
17	229	377	179
18	210	380	205
19	188	337	184
20	207	409	218
21	163	320	160
22	229	283	179
23	176	284	217
24	169	253	184
25	158	260	179
26	149	267	183
27	173	282	165
28	163	240	206
29	180	247	173
30	219	259	185
31	187	223	207
32	187	241	250
33	522	648	531
34	210	284	269
35	489	493	455
36	280	321	297
37	303	358	325
38	2557	2633	2551
39	231	311	254
40	265	312	251
41	276	285	248
42	228	282	224
43	219	244	219
44	205	217	214
45	187	221	175
46	151	178	158
47	187	203	164
48	160	177	167
49	149	182	157
50	155	156	153
51	144	167	155
52	136	136	135
53	198	143	142
54	129	128	118
55	119	122	110
56	126	115	143
57	124	130	190
58	131	128	137
59	114	102	104
60	100	102	113
61	124	94	88
62	99	108	116
63	106	105	108
64	113	113	104
65	127	128	124
66	110	108	103
67	128	110	111
68	113	120	114
69	113	108	110
70	137	140	134
71	109	108	100
72	107	97	92
73	118	105	109
74	109	99	100
75	119	110	113
76	112	107	116
77	128	127	128
78	90	94	93
79	90	96	106
80	86	96	93
81	96	92	97
82	106	136	114
83	75	85	80
84	87	87	90
85	94	103	99
86	89	81	92
87	99	86	86
88	86	92	86
89	90	83	78
90	77	98	98
91	77	81	88
92	77	81	82
93	75	71	79
94	95	91	91
95	88	78	82
96	67	74	67
97	83	78	87
98	87	91	94
99	76	83	76
100	82	70	84
101	72	85	76
102	63	73	80
103	66	85	73
104	58	66	81
105	74	82	78
106	67	73	70
107	56	53	66
108	69	76	74
109	65	77	86
110	74	74	84
111	49	52	65
112	56	57	70
113	38	57	71
114	56	48	63
115	57	60	74
116	46	43	64
117	52	49	68
118	57	46	79
119	56	49	68
120	42	77	73
121	43	54	72
122	54	57	67
123	45	50	61
124	49	54	58
125	53	45	80
126	41	61	76
127	60	66	78
128	47	60	77
129	53	56	82
130	39	53	66
131	39	54	66
132	55	62	91
133	43	58	89
134	53	53	65
135	52	41	74
136	52	59	83
137	57	69	82
138	64	59	90
139	63	70	83
140	62	61	82
141	67	63	79
142	62	74	98
143	56	52	95
144	60	73	88
145	81	86	123
146	64	55	129
147	76	71	103
148	71	86	149
149	70	60	101
150	69	55	130
151	80	80	107
152	97	94	119
153	71	72	121
154	85	72	120
155	97	99	111
156	98	90	135
157	90	109	166
158	77	82	137
159	121	72	108
160	80	83	122
161	128	95	142
162	120	76	112
163	122	112	154
164	101	93	139
165	102	96	197
166	119	94	149
167	115	96	152
168	106	93	148
169	114	94	135
170	98	89	156
171	121	102	144
172	88	96	167
173	170	91	163
174	105	98	135
175	134	119	155
176	164	106	165
177	121	111	157
178	130	110	171
179	138	122	161
180	125	125	168
181	128	112	173
182	128	110	170
183	136	116	201
184	131	158	179
185	116	101	153
186	117	166	182
187	136	124	190
188	124	100	167
189	121	96	259
190	129	91	221
191	115	100	173
192	123	83	181
193	116	118	208
194	144	120	216
195	143	124	215
196	134	103	229
197	171	102	208
198	138	106	184
199	166	110	210
200	157	123	237
201	212	119	233
202	168	109	227
203	149	111	214
204	164	115	235
205	193	130	211
206	159	112	208
207	237	193	196
208	183	135	197
209	160	115	207
210	188	127	208
211	196	158	197
212	199	182	180
213	173	181	242
214	181	160	261
215	186	151	218
216	186	129	219
217	218	205	247
218	160	155	279
219	189	144	268
220	233	151	251
221	213	130	227
222	220	199	254
223	209	149	221
224	236	148	270
225	272	181	327
226	237	186	274
227	255	214	315
228	299	192	316
229	285	278	315
230	358	244	395
231	354	265	392
232	371	345	517
233	428	332	506
234	407	352	556
235	482	363	546
236	572	481	723
237	599	520	739
238	757	575	797
239	827	690	1095
240	977	827	1010
241	1194	943	1311
242	1360	1092	1384
243	1407	1255	1700
244	1722	1488	1890
245	2098	1833	1954
246	2245	2099	2446
247	2731	2293	2405
248	2915	2717	3133
249	3285	3094	3324
250	3408	3574	4139
251	4454	4328	4349
252	4531	5070	3715
253	6837	8317	7432
254	10092	10632	6934
255	275162	274777	275132

## Sheet: Plum
Plum sample RGB color channel frequency
Pixel Value	Red Channel Frequency	Green Channel Frequency	Blue Channel Frequency
0	1829	1497	494
1	259	346	62
2	310	357	68
3	339	340	77
4	359	385	76
5	355	409	79
6	370	411	79
7	412	500	85
8	373	408	80
9	370	393	85
10	387	374	105
11	328	381	94
12	292	319	116
13	343	401	78
14	272	331	103
15	303	323	123
16	296	272	80
17	236	230	70
18	237	185	77
19	210	182	60
20	192	212	60
21	187	172	41
22	226	142	66
23	153	125	122
24	168	138	73
25	106	116	55
26	139	122	72
27	145	123	73
28	136	113	104
29	134	131	79
30	159	120	94
31	133	120	76
32	136	145	127
33	224	304	168
34	142	175	144
35	628	571	513
36	179	201	180
37	213	247	206
38	2456	2483	2417
39	166	192	145
40	188	211	146
41	212	170	137
42	166	171	138
43	156	166	128
44	143	130	141
45	142	141	120
46	110	119	97
47	131	122	105
48	119	113	107
49	121	127	108
50	121	111	91
51	98	107	91
52	98	92	90
53	167	102	91
54	87	91	78
55	79	67	67
56	92	97	96
57	94	87	146
58	95	86	94
59	76	85	66
60	80	68	64
61	97	71	57
62	77	74	67
63	74	72	61
64	89	76	78
65	96	85	79
66	90	93	75
67	97	88	75
68	83	86	69
69	91	83	82
70	126	128	100
71	79	81	65
72	82	76	65
73	80	80	73
74	84	83	64
75	97	89	81
76	86	87	76
77	105	98	85
78	69	66	56
79	60	76	66
80	60	70	60
81	81	81	63
82	86	91	87
83	69	62	53
84	72	59	58
85	65	68	60
86	75	68	62
87	68	68	64
88	66	58	51
89	63	63	53
90	67	66	70
91	65	68	56
92	54	50	46
93	57	53	41
94	71	74	70
95	62	55	49
96	48	54	41
97	60	60	52
98	65	60	62
99	54	52	49
100	52	61	54
101	53	54	49
102	53	55	40
103	59	55	55
104	45	49	43
105	63	52	53
106	50	48	36
107	38	27	37
108	44	51	47
109	47	50	49
110	56	60	57
111	33	35	31
112	33	25	32
113	35	36	30
114	37	30	23
115	42	41	40
116	35	36	39
117	42	41	38
118	39	38	43
119	33	38	33
120	35	32	37
121	40	39	37
122	38	34	38
123	40	35	42
124	39	45	39
125	31	39	37
126	27	37	32
127	45	43	42
128	41	44	50
129	32	33	43
130	27	31	37
131	30	36	42
132	37	51	44
133	38	37	48
134	33	27	44
135	44	25	36
136	34	42	56
137	48	39	60
138	36	44	48
139	54	58	75
140	40	36	53
141	41	40	56
142	49	55	58
143	42	48	54
144	46	33	62
145	67	56	92
146	43	43	95
147	47	47	67
148	64	52	114
149	45	50	60
150	42	43	87
151	53	54	91
152	68	68	95
153	53	63	87
154	57	59	86
155	80	63	92
156	68	69	86
157	75	63	122
158	64	66	92
159	103	50	77
160	50	52	77
161	100	73	86
162	94	68	71
163	78	80	105
164	72	56	85
165	84	62	165
166	87	77	111
167	100	80	115
168	63	69	95
169	77	71	98
170	74	79	101
171	68	69	94
172	69	72	98
173	138	77	119
174	76	65	105
175	101	86	119
176	118	78	127
177	85	79	106
178	76	77	113
179	83	90	121
180	82	91	126
181	82	80	133
182	87	88	139
183	95	106	153
184	105	130	159
185	79	77	124
186	77	141	126
187	91	92	148
188	70	72	137
189	92	79	200
190	70	74	174
191	65	61	124
192	69	71	131
193	75	76	204
194	82	84	176
195	94	92	177
196	77	72	210
197	97	75	169
198	87	66	163
199	77	66	186
200	79	73	224
201	132	75	232
202	86	65	218
203	65	71	179
204	84	77	217
205	105	74	192
206	75	88	174
207	153	133	179
208	101	93	162
209	78	63	162
210	94	83	168
211	100	100	175
212	100	139	151
213	73	126	194
214	86	111	209
215	88	78	192
216	75	73	162
217	111	138	208
218	61	98	216
219	93	74	220
220	110	87	178
221	111	74	164
222	88	116	166
223	107	94	180
224	135	84	185
225	157	113	232
226	118	93	210
227	137	113	211
228	148	125	237
229	187	184	247
230	215	140	281
231	209	179	300
232	223	227	329
233	261	215	428
234	301	228	427
235	316	255	417
236	374	354	560
237	421	369	600
238	531	414	643
239	620	527	843
240	706	611	909
241	886	746	1092
242	1046	888	1287
243	1098	1030	1577
244	1408	1250	1593
245	1639	1460	1840
246	1907	1640	2104
247	2352	1888	2286
248	2619	2306	2807
249	2941	2810	3149
250	3343	3297	4008
251	4377	4122	3836
252	4408	4771	3540
253	7064	8188	6800
254	10697	10628	6845
255	288823	290847	292915

## Sheet: Tomatoes
Tomatoes sample RGB color channel frequency
Pixel Value	Red Channel Frequency	Green Channel Frequency	Blue Channel Frequency
0	2553	1343	682
1	271	280	78
2	292	307	86
3	298	319	93
4	348	331	96
5	306	341	107
6	322	330	103
7	370	454	112
8	341	332	99
9	308	350	110
10	358	311	138
11	288	353	129
12	287	304	148
13	285	407	121
14	258	303	145
15	282	342	148
16	245	259	112
17	229	217	107
18	216	197	109
19	191	199	100
20	215	234	101
21	181	182	82
22	237	146	91
23	165	154	153
24	161	134	101
25	155	138	75
26	144	130	101
27	163	159	101
28	133	127	134
29	156	137	105
30	203	150	103
31	146	130	116
32	163	152	157
33	244	320	197
34	181	184	177
35	616	523	512
36	234	210	210
37	242	248	235
38	2455	2459	2427
39	190	213	165
40	225	215	162
41	231	175	147
42	190	173	159
43	206	171	141
44	149	132	151
45	167	141	148
46	138	130	114
47	155	127	122
48	139	135	131
49	137	135	144
50	146	136	124
51	121	98	108
52	120	109	101
53	194	112	105
54	124	98	100
55	93	100	85
56	109	95	114
57	120	110	159
58	120	96	109
59	109	98	100
60	105	80	92
61	126	73	85
62	106	108	95
63	93	82	85
64	115	86	88
65	118	109	97
66	118	96	94
67	101	101	104
68	104	104	89
69	111	110	92
70	136	123	116
71	98	94	87
72	105	91	87
73	89	91	78
74	101	80	94
75	111	106	92
76	101	91	93
77	114	104	99
78	92	73	76
79	92	86	80
80	82	79	89
81	89	85	85
82	114	108	103
83	71	71	71
84	69	83	77
85	79	77	77
86	80	82	73
87	90	86	72
88	69	68	75
89	80	75	71
90	79	68	80
91	79	67	68
92	64	62	60
93	66	59	72
94	80	79	87
95	64	51	75
96	58	56	59
97	74	75	73
98	84	83	81
99	67	66	66
100	54	60	75
101	72	82	68
102	54	56	71
103	71	68	62
104	64	59	67
105	65	64	67
106	50	55	58
107	50	40	48
108	54	64	61
109	56	55	60
110	63	67	66
111	43	42	59
112	56	37	54
113	42	49	54
114	41	41	54
115	42	43	49
116	42	53	56
117	54	45	60
118	37	38	56
119	42	38	51
120	34	46	49
121	39	44	55
122	41	39	56
123	34	46	44
124	41	53	45
125	40	33	41
126	40	53	46
127	49	42	62
128	43	48	44
129	29	47	69
130	37	40	47
131	41	39	56
132	42	46	65
133	45	47	45
134	43	34	59
135	32	48	66
136	42	39	67
137	56	54	67
138	41	35	60
139	55	62	86
140	47	53	73
141	51	50	72
142	54	56	88
143	45	48	71
144	64	49	86
145	63	65	97
146	45	55	101
147	52	52	81
148	56	70	120
149	41	43	70
150	39	47	103
151	60	57	88
152	71	71	111
153	63	72	90
154	65	54	96
155	83	74	110
156	73	86	103
157	75	76	166
158	66	70	102
159	101	58	100
160	59	63	95
161	108	64	102
162	106	66	115
163	76	84	113
164	70	64	95
165	84	66	164
166	85	88	115
167	92	87	128
168	72	66	105
169	80	71	97
170	82	79	114
171	81	82	136
172	74	84	122
173	148	84	126
174	72	74	113
175	92	92	133
176	123	91	133
177	99	92	126
178	80	89	118
179	91	95	145
180	91	89	131
181	85	84	132
182	87	91	148
183	101	96	159
184	107	138	156
185	95	94	132
186	83	145	147
187	82	92	170
188	86	79	133
189	76	89	226
190	81	87	201
191	75	74	145
192	88	80	149
193	86	82	174
194	90	92	167
195	96	117	190
196	91	79	207
197	114	88	167
198	87	89	176
199	88	97	184
200	88	96	213
201	146	90	218
202	96	75	207
203	69	76	198
204	90	97	209
205	115	87	175
206	91	121	198
207	151	158	191
208	107	121	177
209	76	94	163
210	95	106	168
211	118	117	175
212	110	169	167
213	92	158	220
214	103	135	204
215	110	108	193
216	103	95	163
217	133	182	180
218	80	118	251
219	101	126	204
220	129	101	190
221	129	107	167
222	96	152	176
223	123	142	198
224	159	120	211
225	187	159	227
226	157	150	224
227	154	155	248
228	205	150	232
229	218	250	275
230	258	187	292
231	223	197	317
232	260	270	391
233	315	259	463
234	344	299	462
235	355	295	448
236	420	373	629
237	475	388	658
238	583	460	708
239	671	574	905
240	801	661	953
241	987	820	1233
242	1150	991	1313
243	1267	1103	1602
244	1564	1302	1700
245	1802	1558	1876
246	2082	1825	2263
247	2539	2056	2388
248	2833	2556	3032
249	3232	2961	3457
250	3459	3439	4206
251	4597	4347	4316
252	4725	5098	3732
253	7020	8463	7358
254	10408	10884	6739
255	283747	286336	286068
